# Supplementary material
Source: publisher figshare collection journal article supplement (https://acs.figshare.com/ndownloader/files/7647973)
Supplement: Supplementary file 1 [file 7647973]

## Supporting information

### NMR data

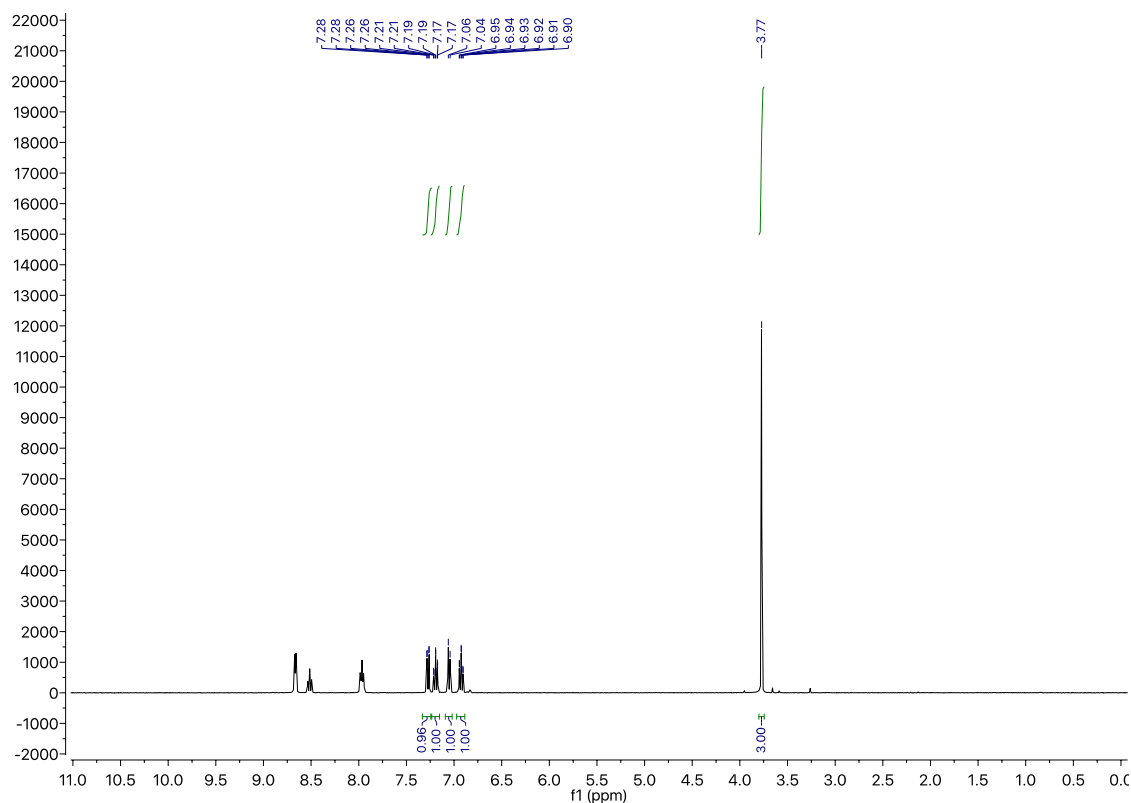

Figure 1 <sup>1</sup>H NMR of guaiacol-*O*-sulfate (1a).

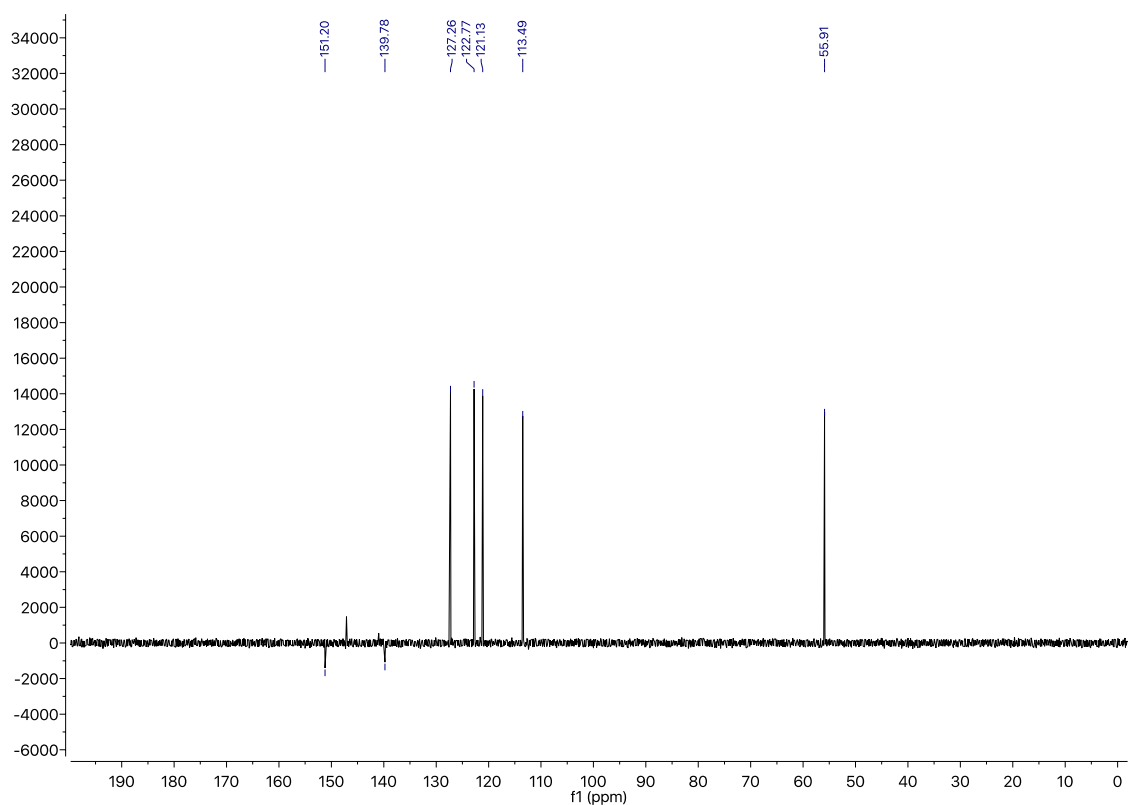

Figure 2 <sup>13</sup>C NMR of guaiacol-*O*-sulfate (1a).

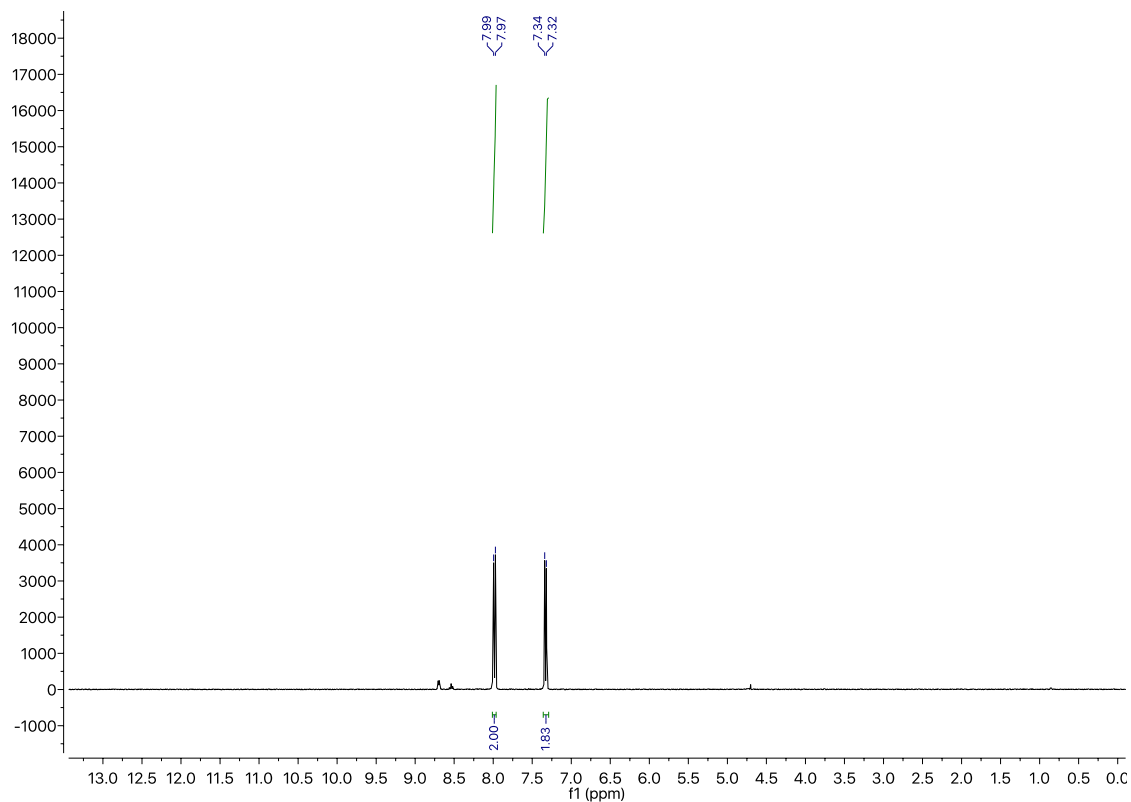

**Figure 3** <sup>1</sup>H NMR of benzoic acid 4-O-sulfate (1b).

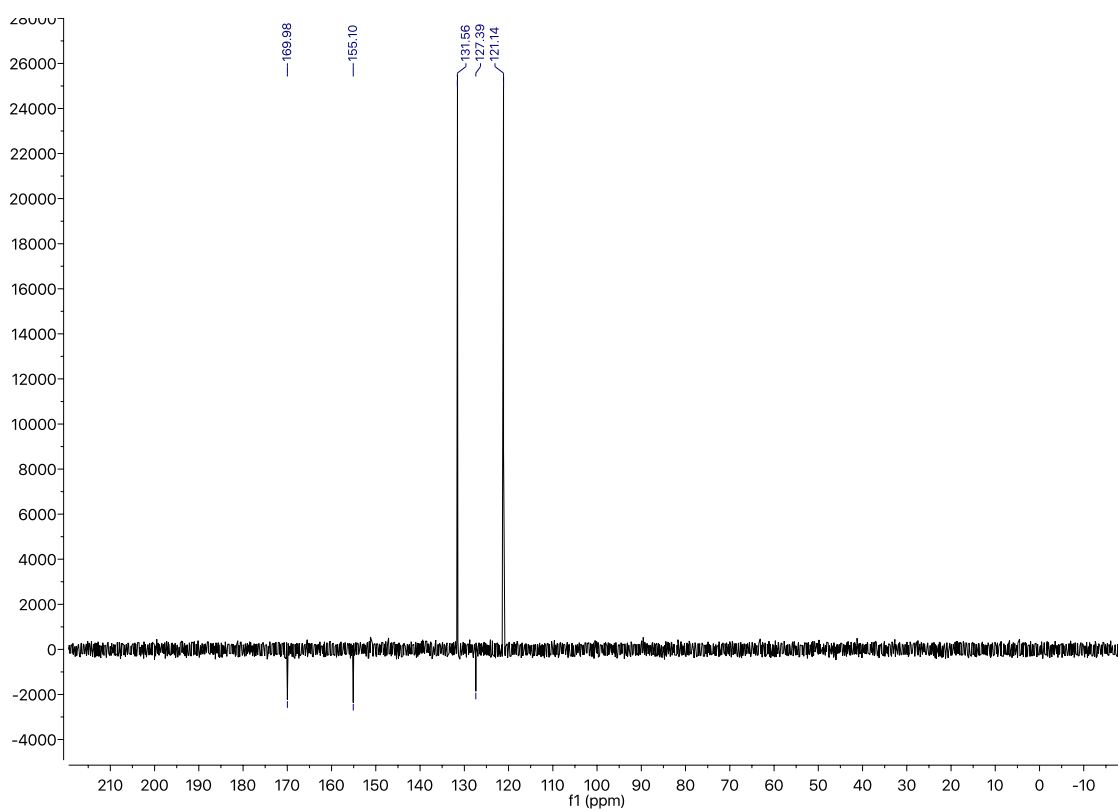

**Figure 4** <sup>13</sup>C NMR of benzoic acid 4-O-sulfate (1b).

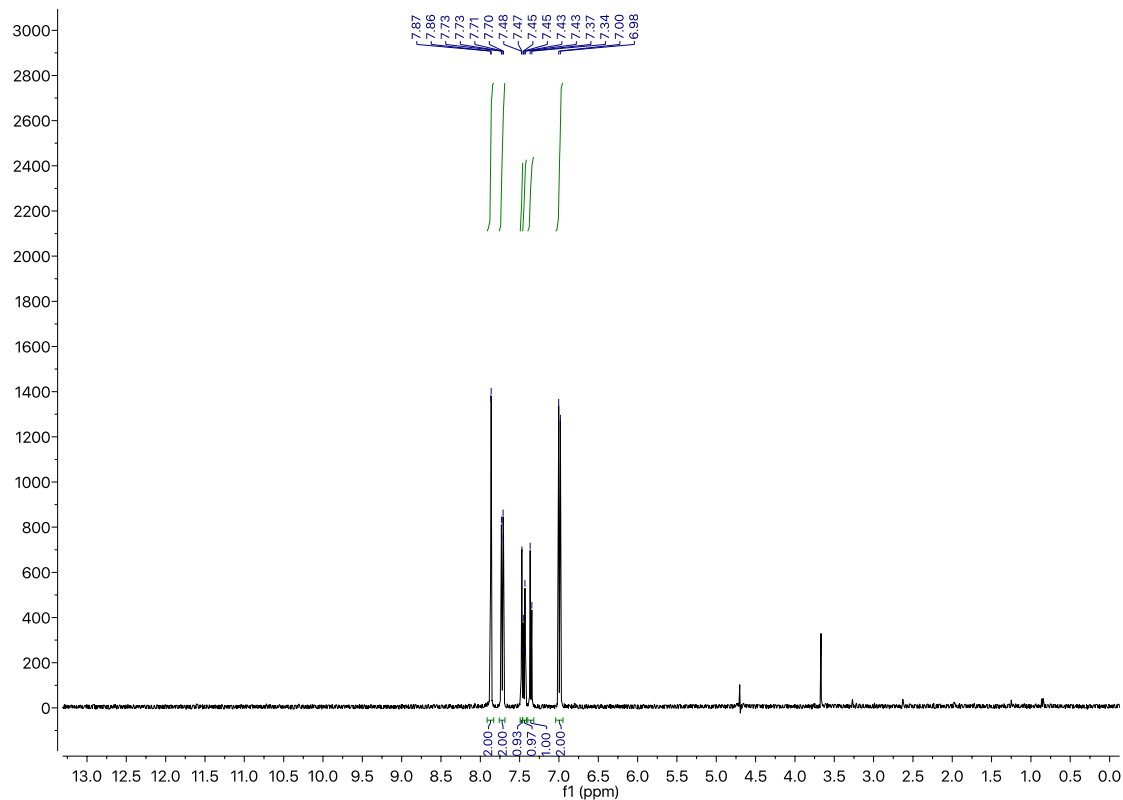

**Figure 5**  $^1\text{H}$  NMR of protocathechuic acid 4-*O*-sulfate (**1c**) and protocathechuic acid 3-*O*-sulfate (**1d**).

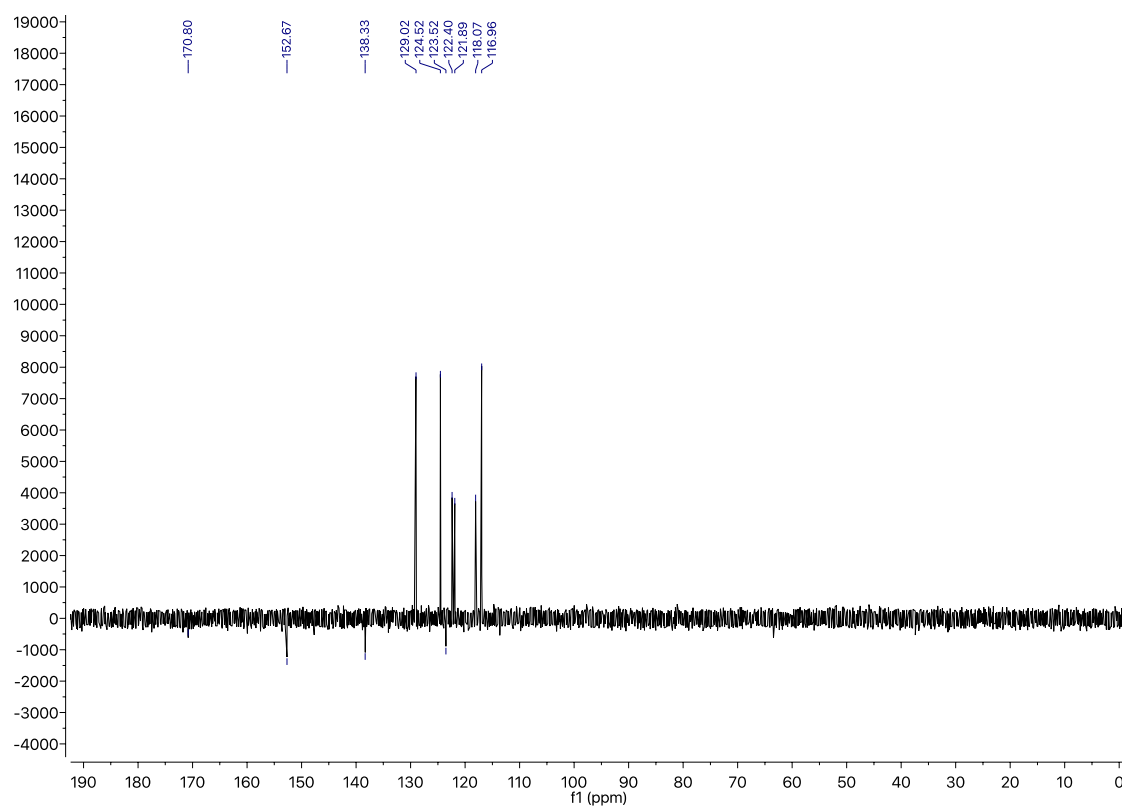

**Figure 6**  $^{13}\text{C}$  NMR of protocathechuic acid 4-*O*-sulfate (**1c**) and protocathechuic acid 3-*O*-sulfate (**1d**).

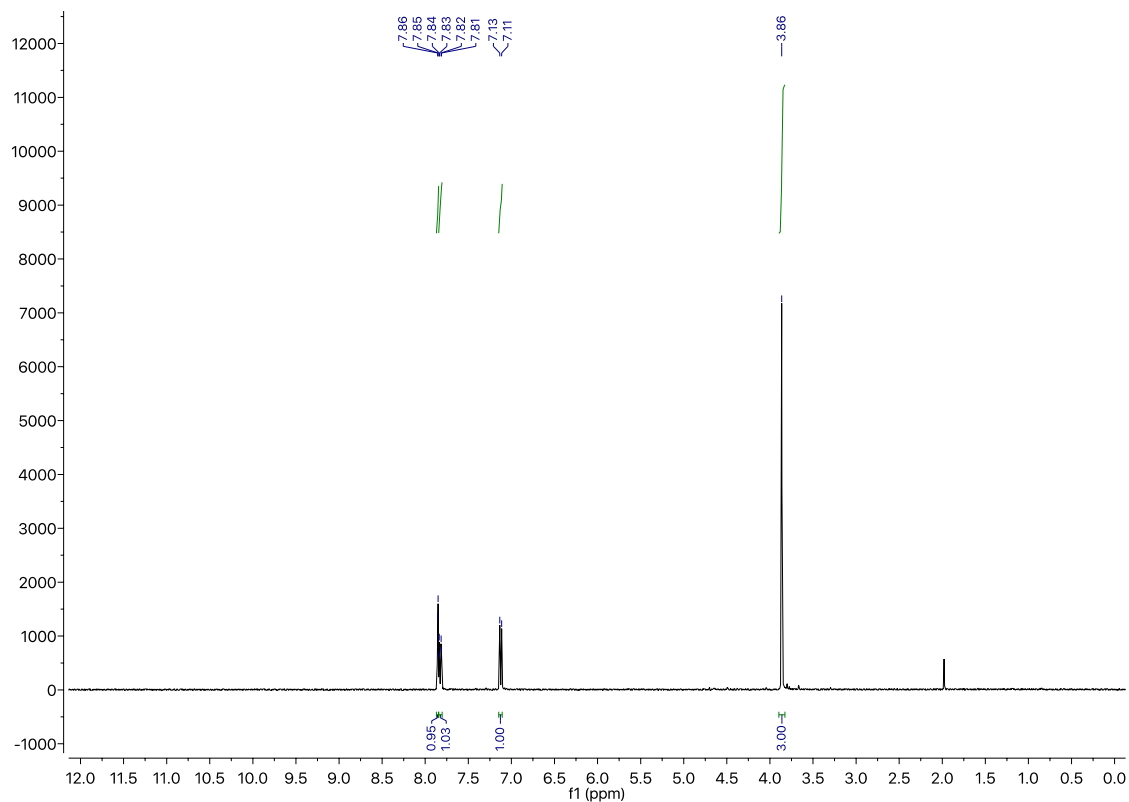

**Figure 7**  $^1\text{H}$  NMR of isovanillic acid 3-*O*-sulfate (**1e**).

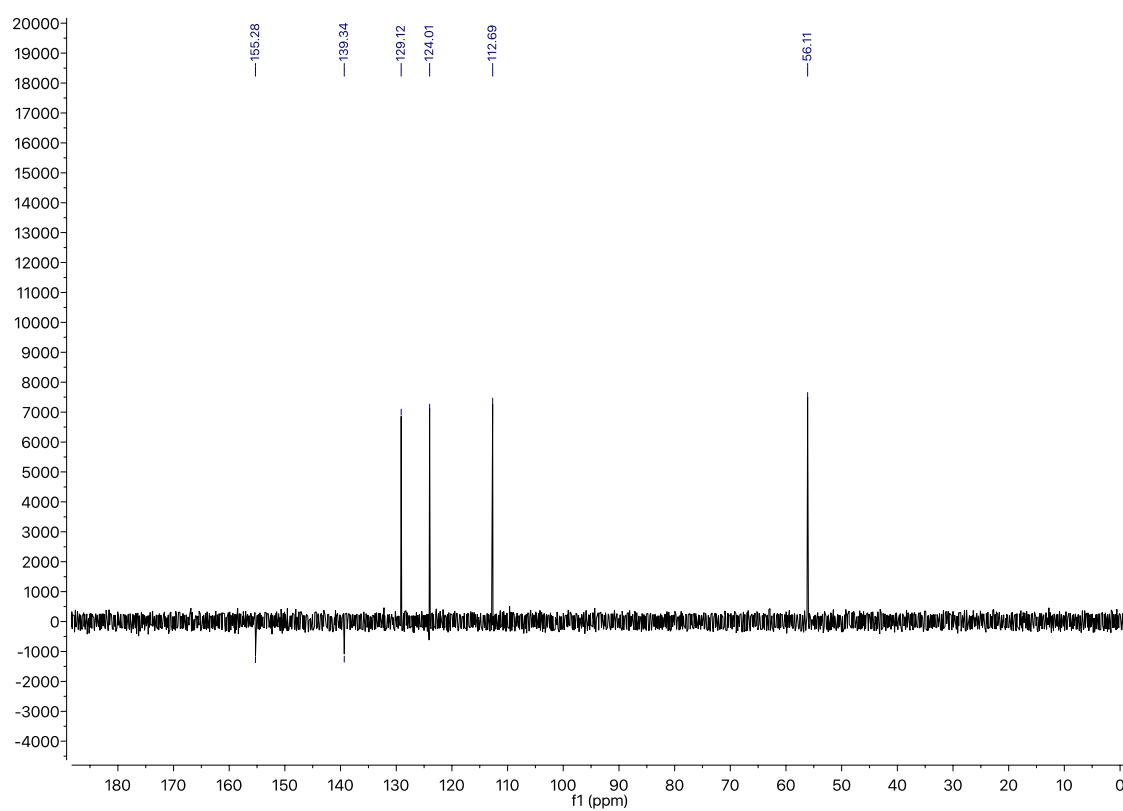

**Figure 8**  $^{13}\text{C}$  NMR of isovanillic acid 3-*O*-sulfate (**1e**).

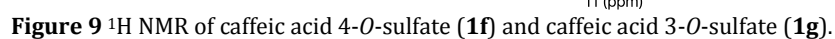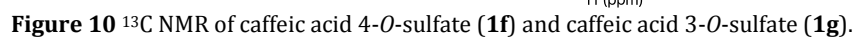

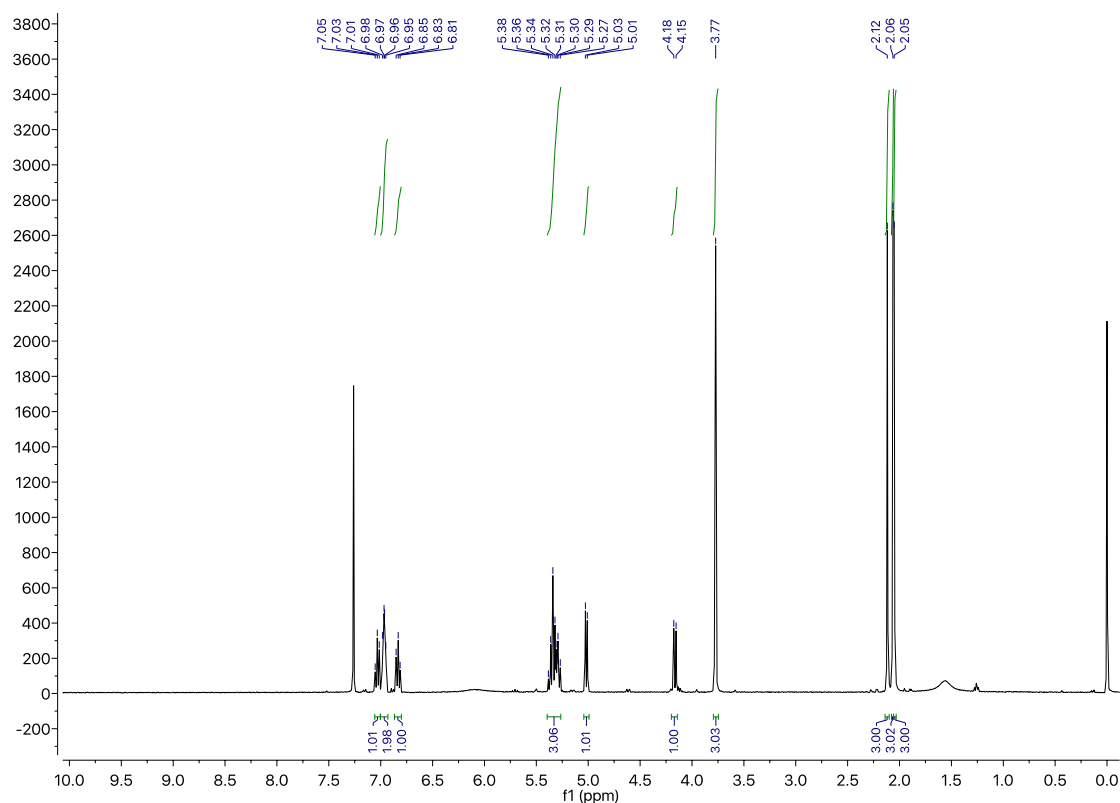

**Figure 11**  $^1\text{H}$  NMR of methyl 2,3,4-tri-*O*-acetyl-1-*O*-(2-hydroxyphenyl)- $\beta$ -D-glucuronate (**6a**).

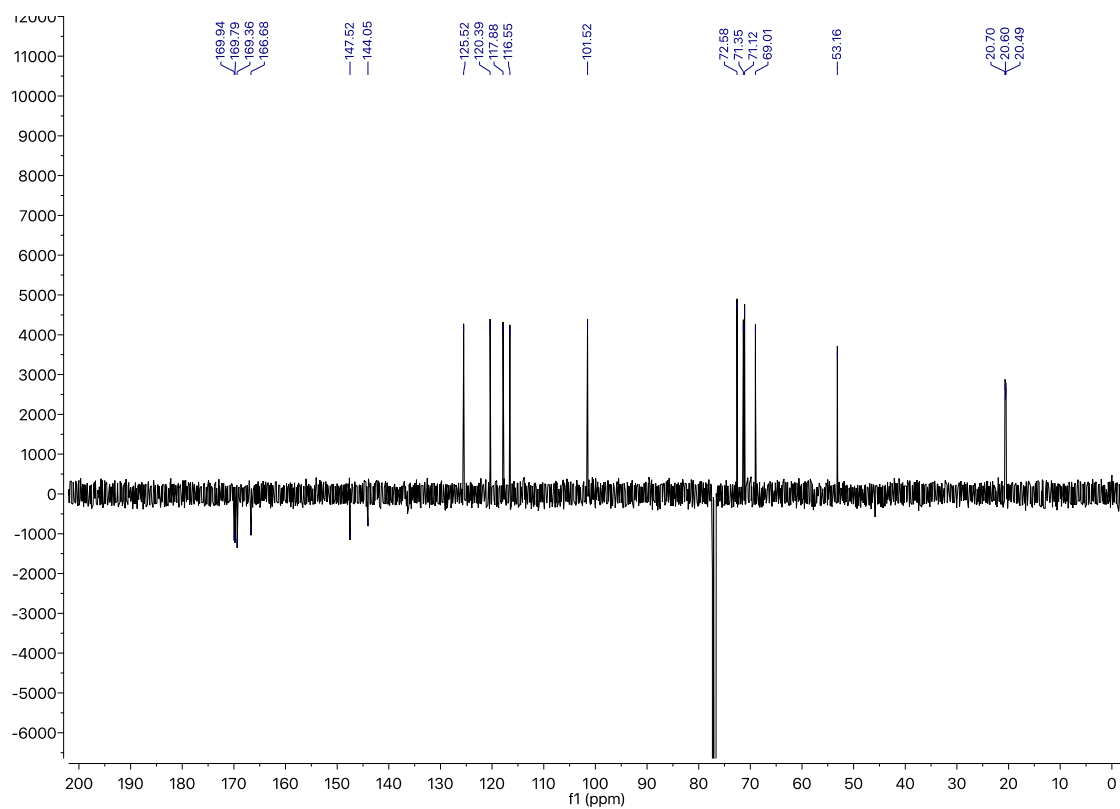

**Figure 12**  $^{13}\text{C}$  NMR of methyl 2,3,4-tri-*O*-acetyl-1-*O*-(2-hydroxyphenyl)- $\beta$ -D-glucuronate (**6a**).

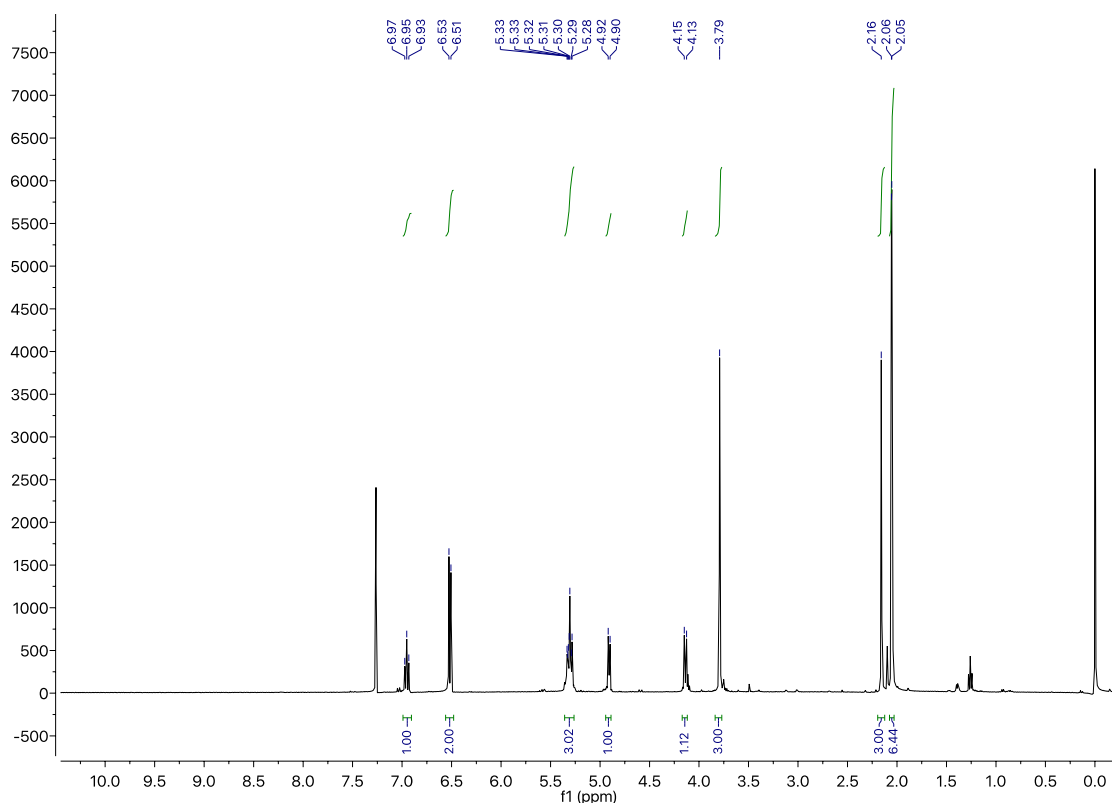

**Figure 13**  $^1\text{H}$  NMR of methyl 2,3,4-tri-*O*-acetyl-1-*O*-(1,3-dihydroxyphenyl)- $\beta$ -D-glucuronate (**6b**).

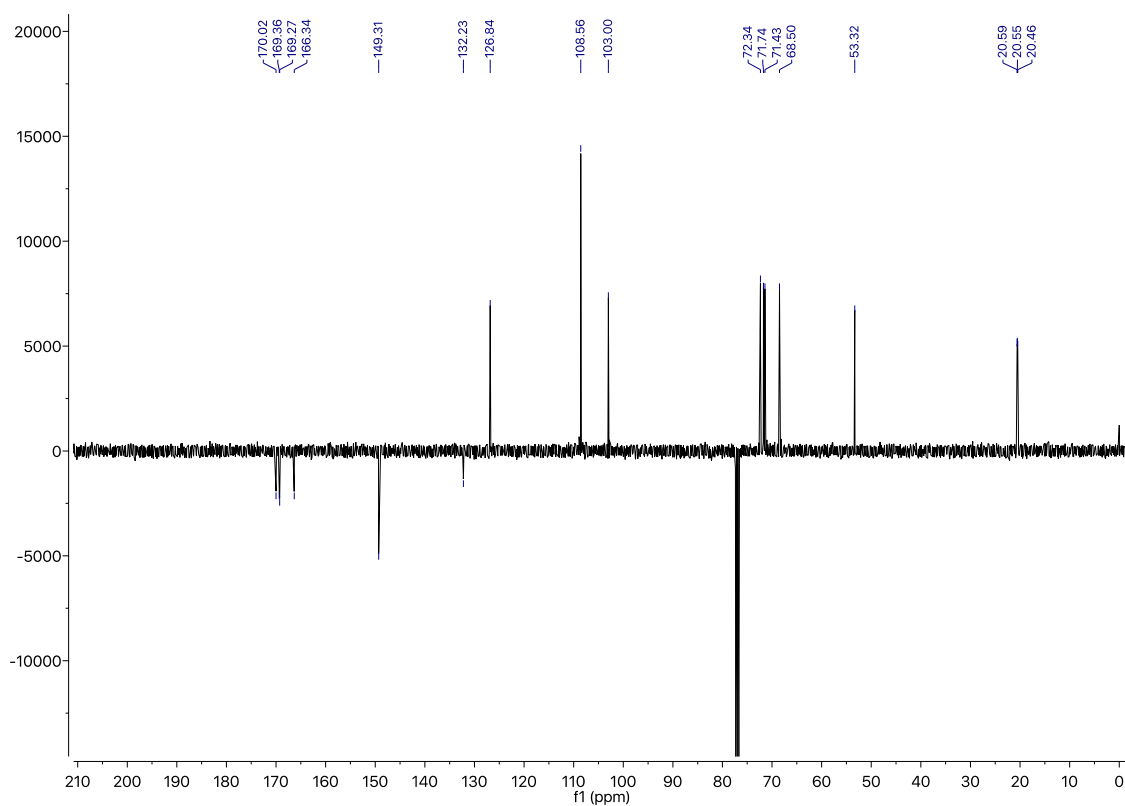

**Figure 14**  $^{13}\text{C}$  NMR of methyl 2,3,4-tri-*O*-acetyl-1-*O*-(1,3-dihydroxyphenyl)- $\beta$ -D-glucuronate (**6b**).

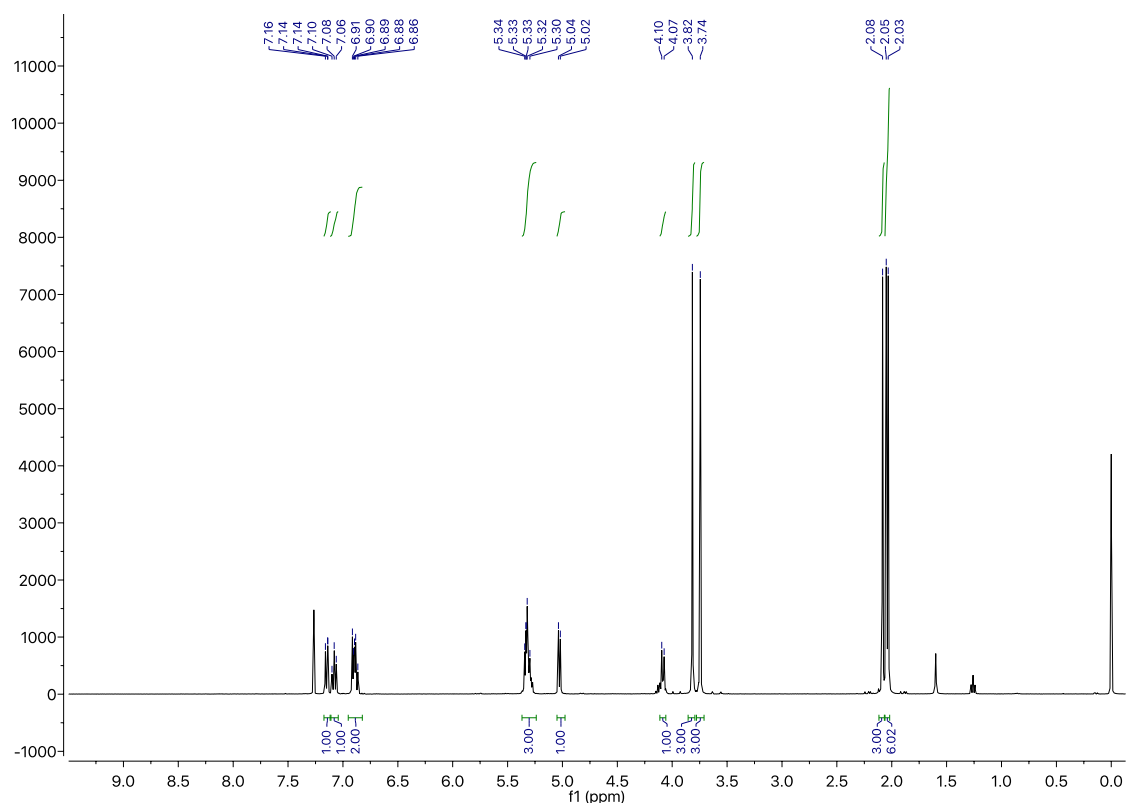

**Figure 15**  $^1\text{H}$  NMR of methyl 2,3,4-tri-*O*-acetyl-1-*O*-(4-methoxyphenyl)- $\beta$ -D-glucuronate (**6c**).

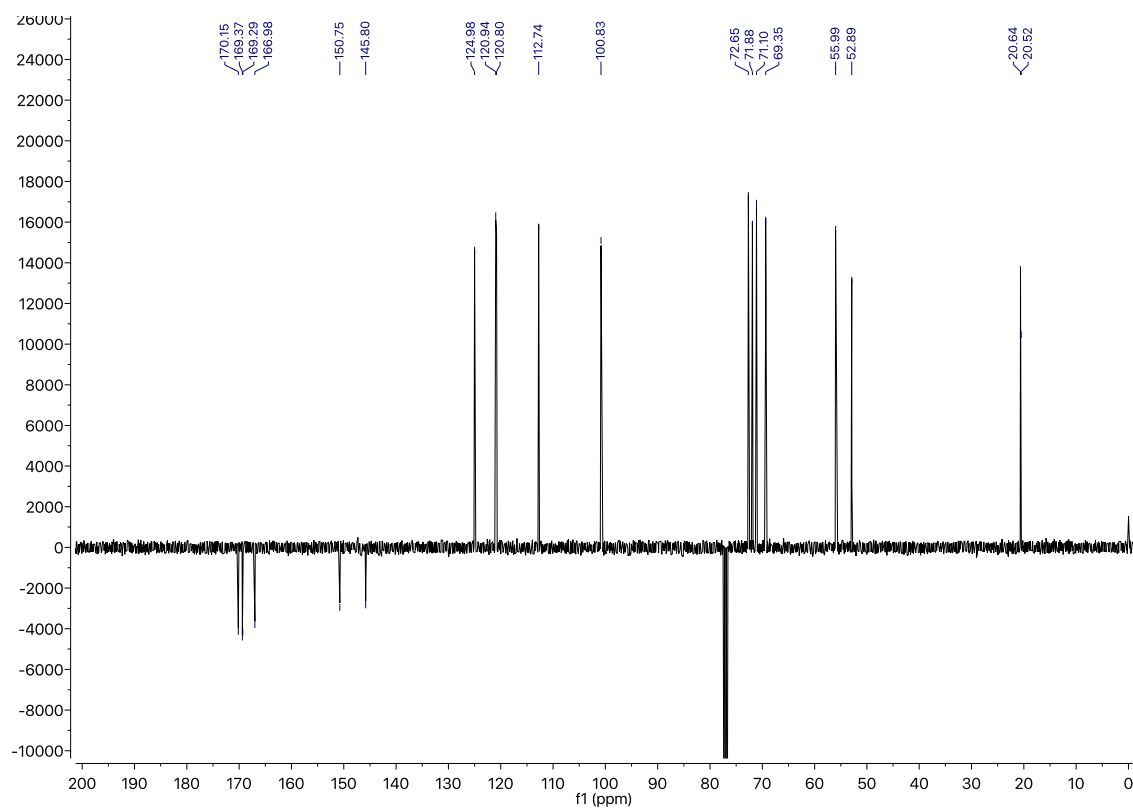

**Figure 16**  $^{13}\text{C}$  NMR of methyl 2,3,4-tri-*O*-acetyl-1-*O*-(4-methoxyphenyl)- $\beta$ -D-glucuronate (**6c**).



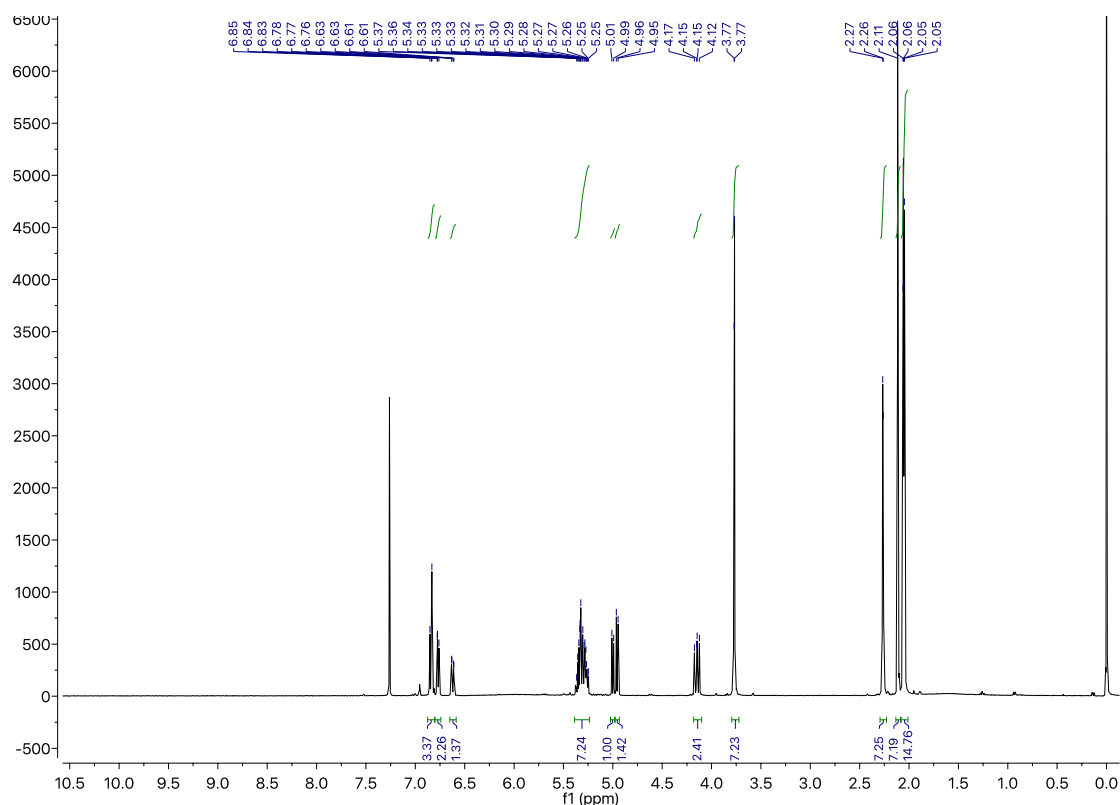

**Figure 17**  $^1\text{H}$  NMR of methyl 2,3,4-tri-*O*-acetyl-1-*O*-(1-hydroxy-4-methylphenyl)- $\beta$ -D-glucuronate (**6d**) and methyl 2,3,4-tri-*O*-acetyl-1-*O*-(2-hydroxy-4-methylphenyl)- $\beta$ -D-glucuronate (**6e**).

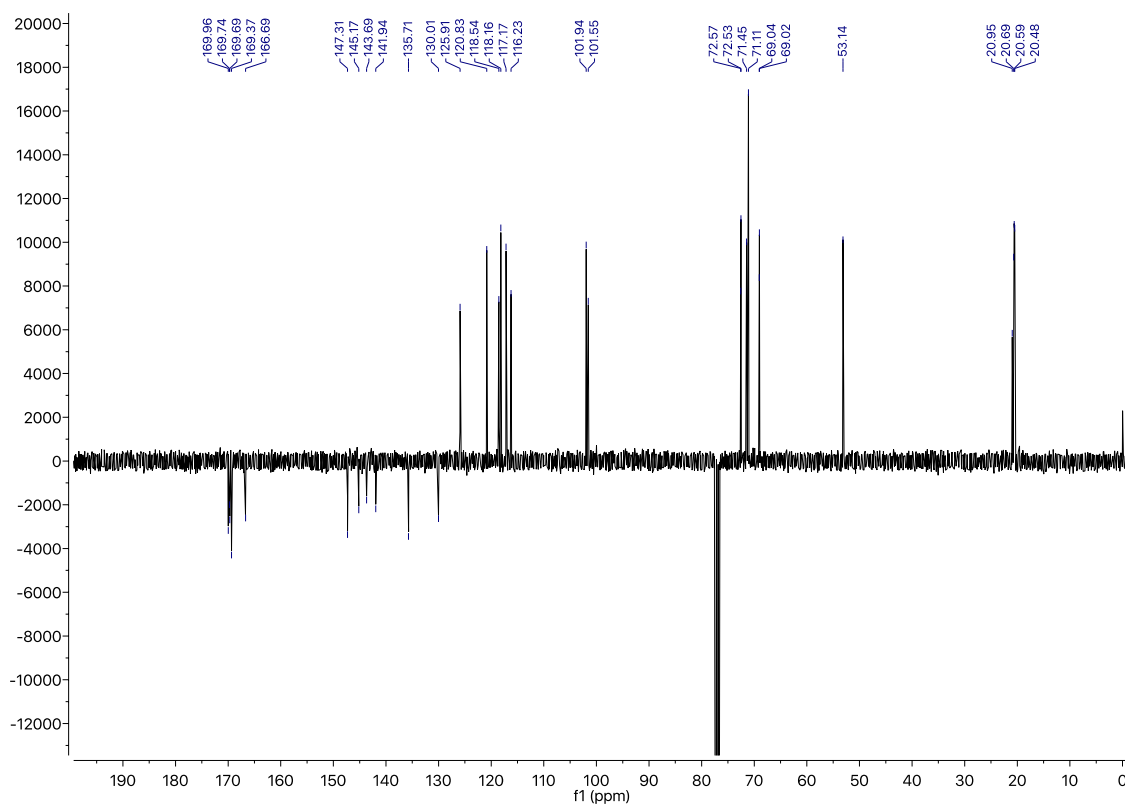

**Figure 18**  $^{13}\text{C}$  NMR of methyl 2,3,4-tri-*O*-acetyl-1-*O*-(1-hydroxy-4-methylphenyl)- $\beta$ -D-glucuronate (**6d**) and methyl 2,3,4-tri-*O*-acetyl-1-*O*-(2-hydroxy-4-methylphenyl)- $\beta$ -D-glucuronate (**6e**).

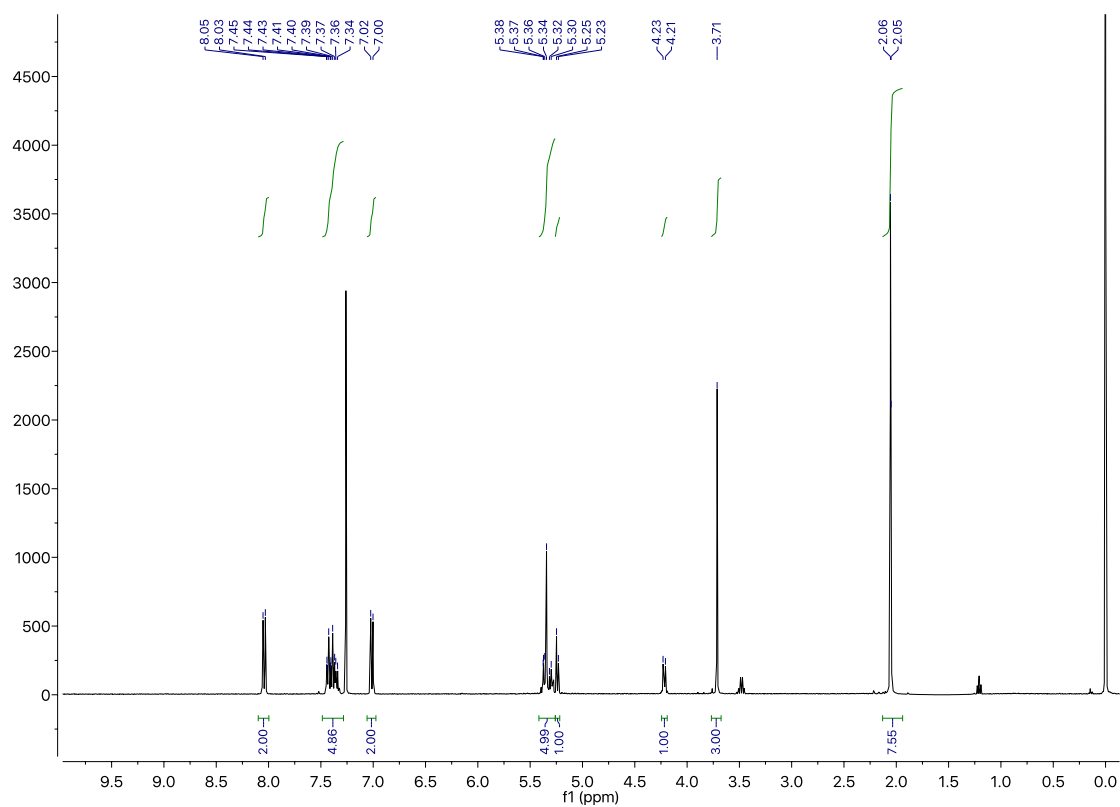

**Figure 19**  $^1\text{H}$  NMR of methyl 2,3,4-tri-*O*-acetyl-1-*O*-(4-benzylcarbonylphenyl)- $\beta$ -D-glucuronate (**6f**).

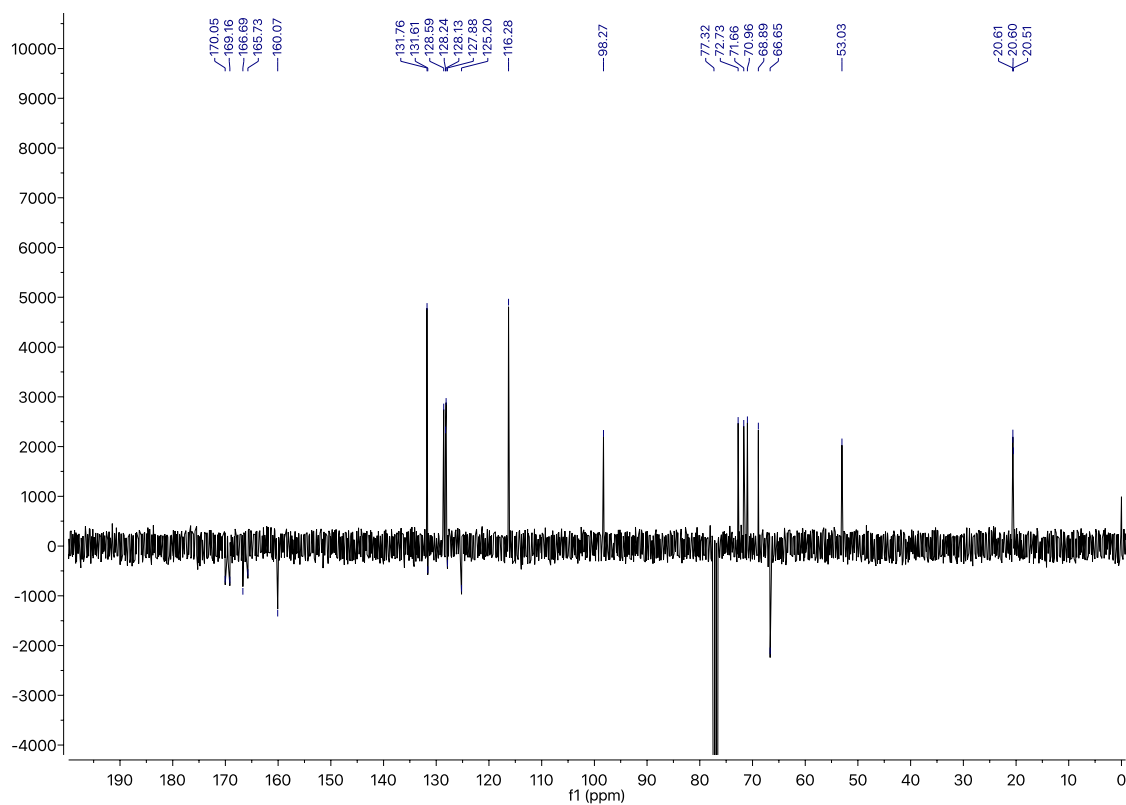

**Figure 20**  $^{13}\text{C}$  NMR of methyl 2,3,4-tri-*O*-acetyl-1-*O*-(4-benzylcarbonylphenyl)- $\beta$ -D-glucuronate (**6f**).

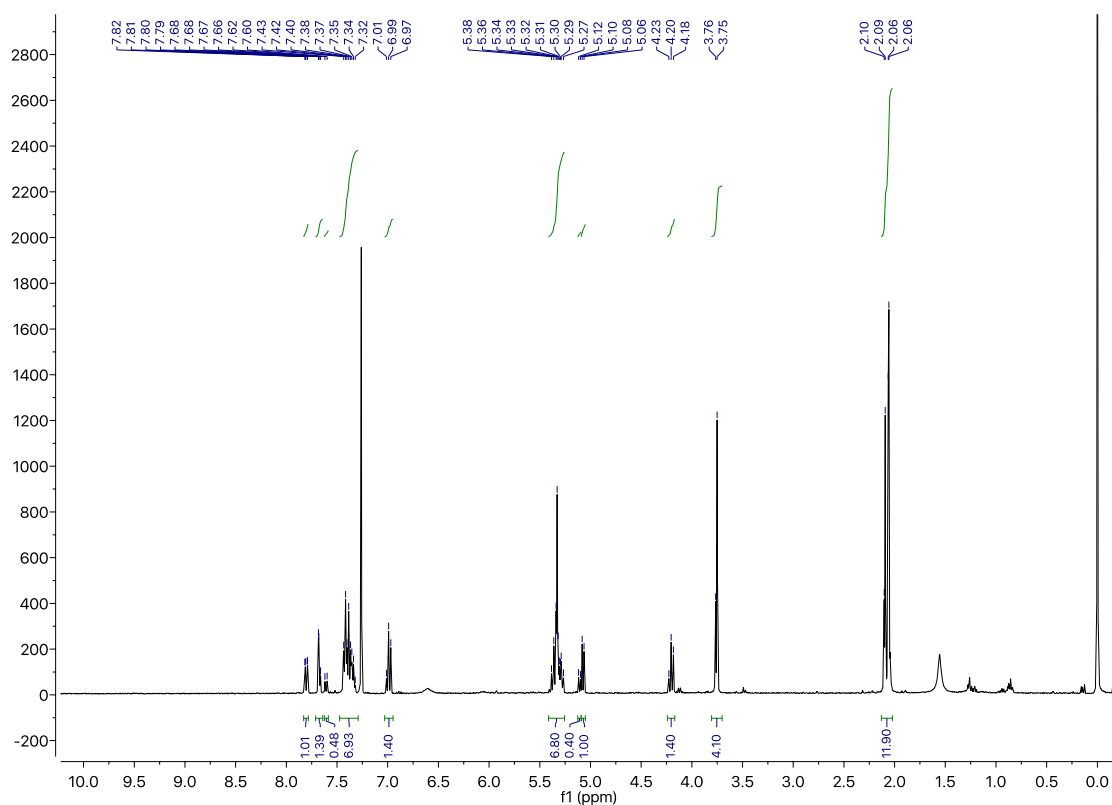

**Figure 21**  $^1\text{H}$  NMR of methyl 2,3,4-tri-*O*-acetyl-1-*O*-(2-hydroxy-4-benzylcarbonylphenyl)- $\beta$ -D-glucuronate (**6g**) and methyl 2,3,4-tri-*O*-acetyl-1-*O*-(2-hydroxy-5-benzylcarbonylphenyl)- $\beta$ -D-glucuronate (**6h**).

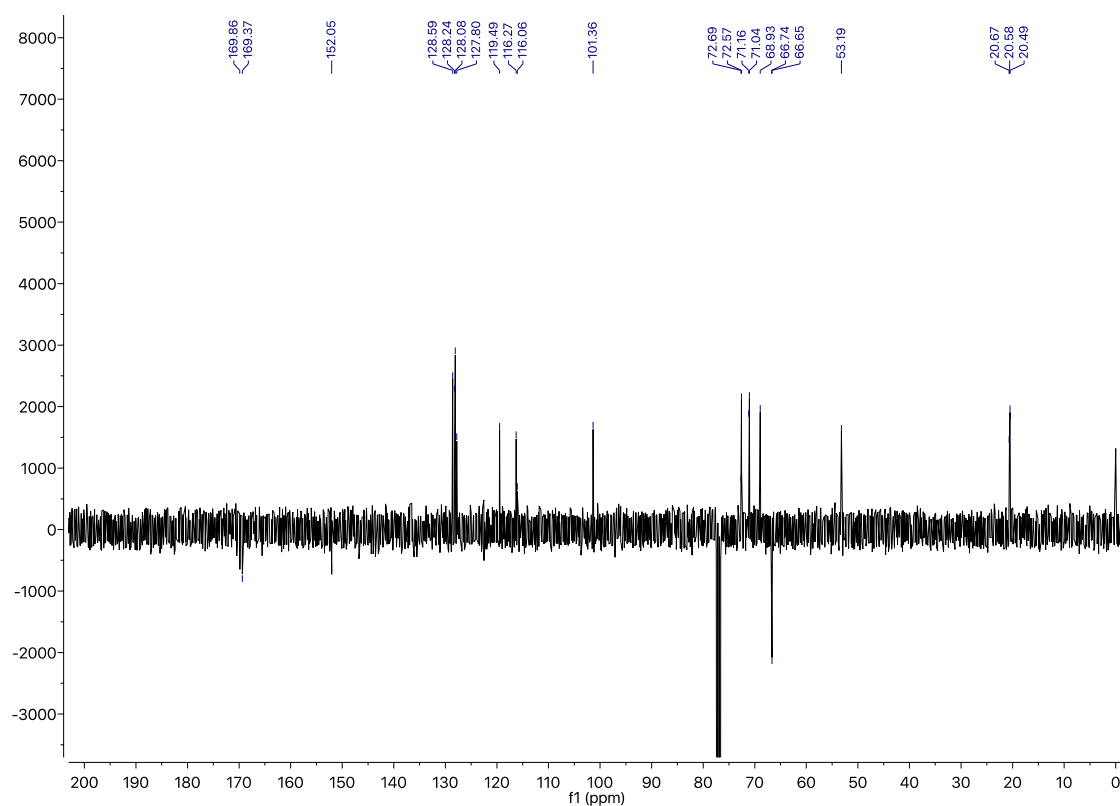

**Figure 22**  $^{13}\text{C}$  NMR of methyl 2,3,4-tri-*O*-acetyl-1-*O*-(2-hydroxy-4-benzylcarbonylphenyl)- $\beta$ -D-glucuronate (**6g**) and methyl 2,3,4-tri-*O*-acetyl-1-*O*-(2-hydroxy-5-benzylcarbonylphenyl)- $\beta$ -D-glucuronate (**6h**).

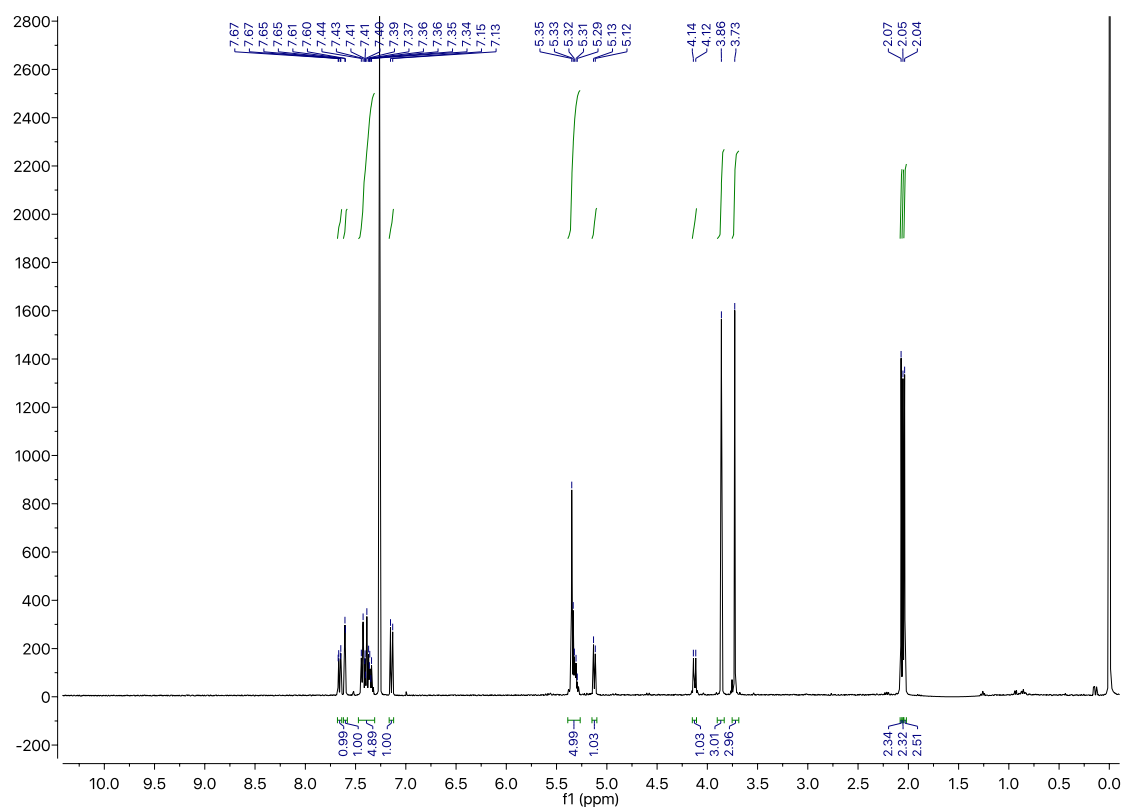

**Figure 23** <sup>1</sup>H NMR of methyl 2,3,4-tri-*O*-acetyl-1-*O*-(2-methoxy-4-benzylcarbonylphenyl)-β-D-glucuronate (**6i**).

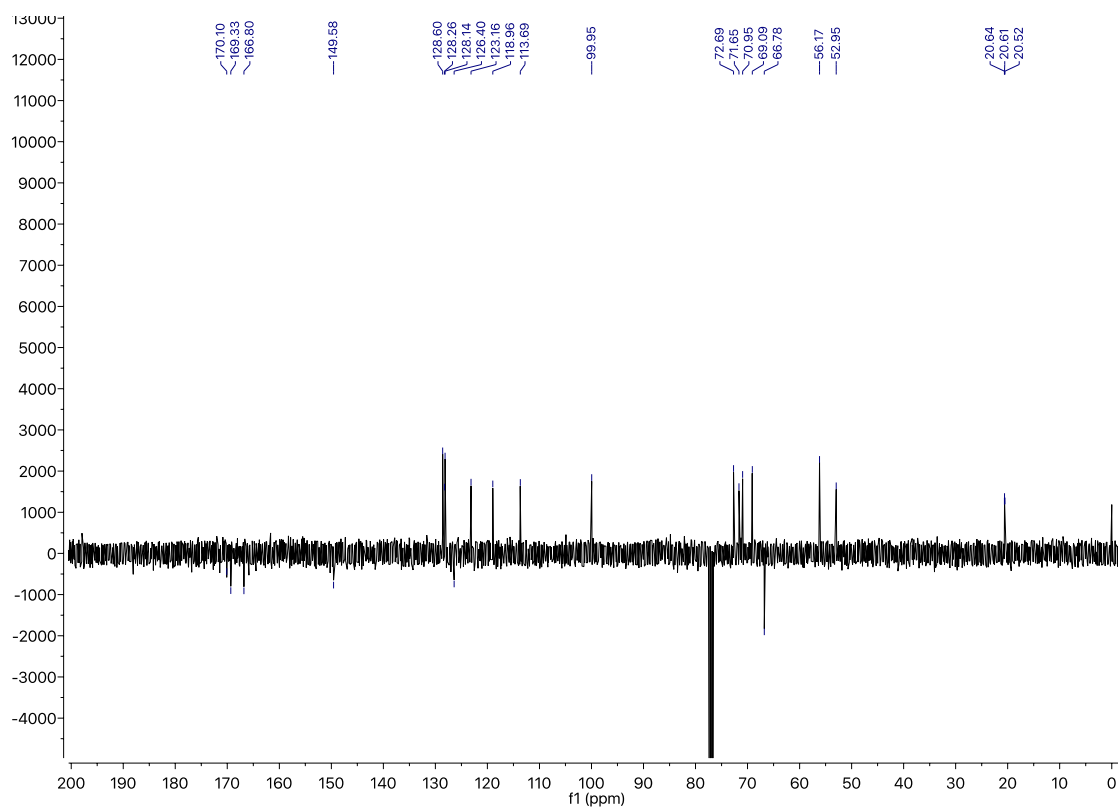

**Figure 24** <sup>13</sup>C NMR of methyl 2,3,4-tri-*O*-acetyl-1-*O*-(2-methoxy-4-benzylcarbonylphenyl)-β-D-glucuronate (**6i**).

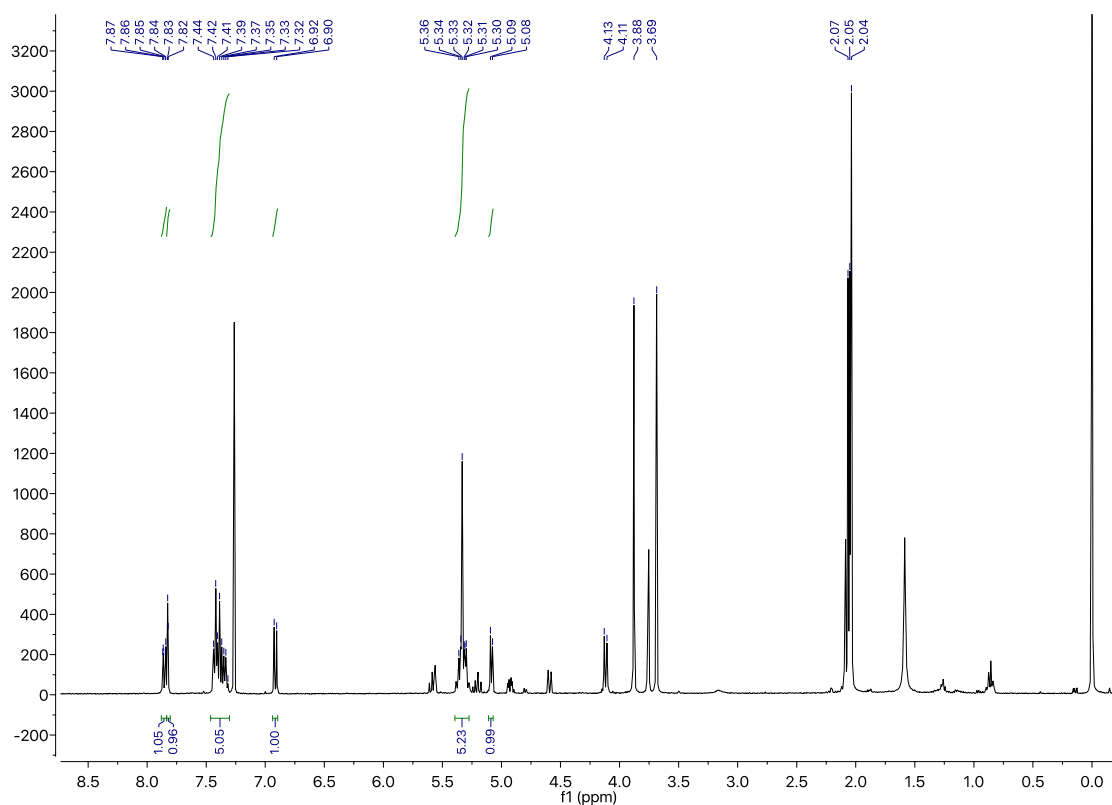

**Figure 25**  $^1\text{H}$  NMR of methyl 2,3,4-tri-*O*-acetyl-1-*O*-(2-methoxy-5-benzylcarbonylphenyl)- $\beta$ -D-glucuronate (**6j**).

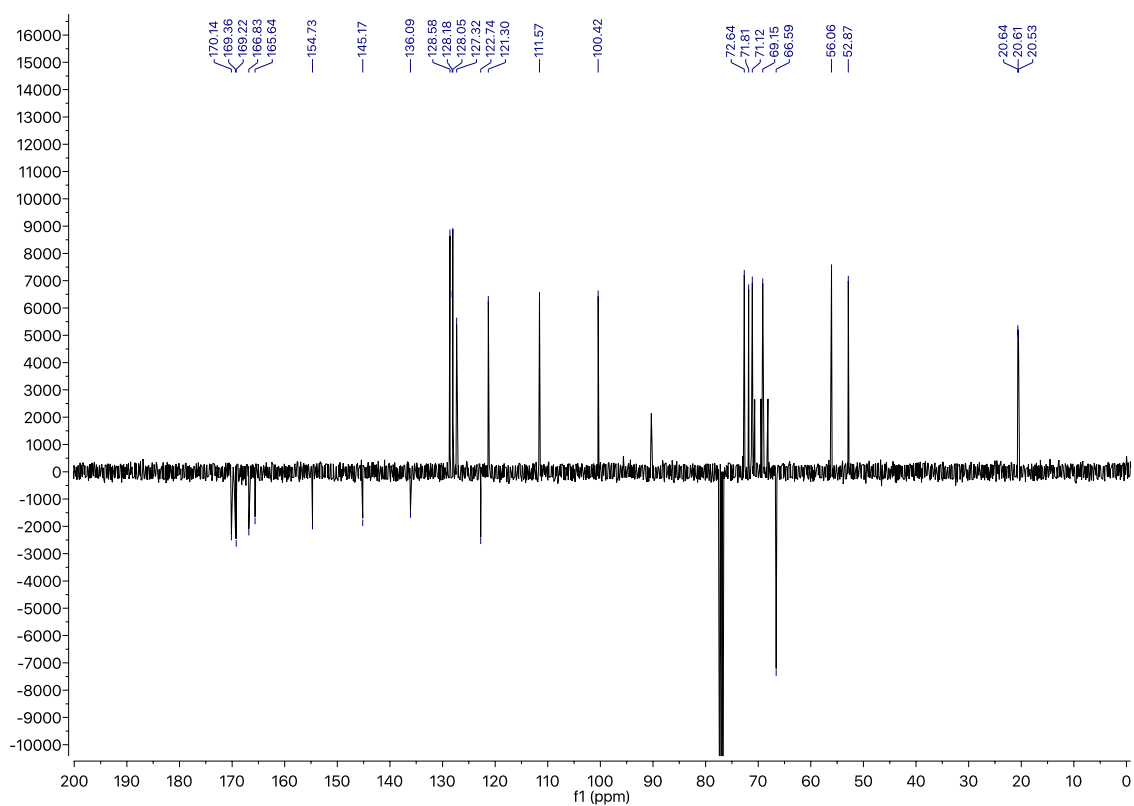

**Figure 26**  $^{13}\text{C}$  NMR of methyl 2,3,4-tri-*O*-acetyl-1-*O*-(2-methoxy-5-benzylcarbonylphenyl)- $\beta$ -D-glucuronate (**6j**).

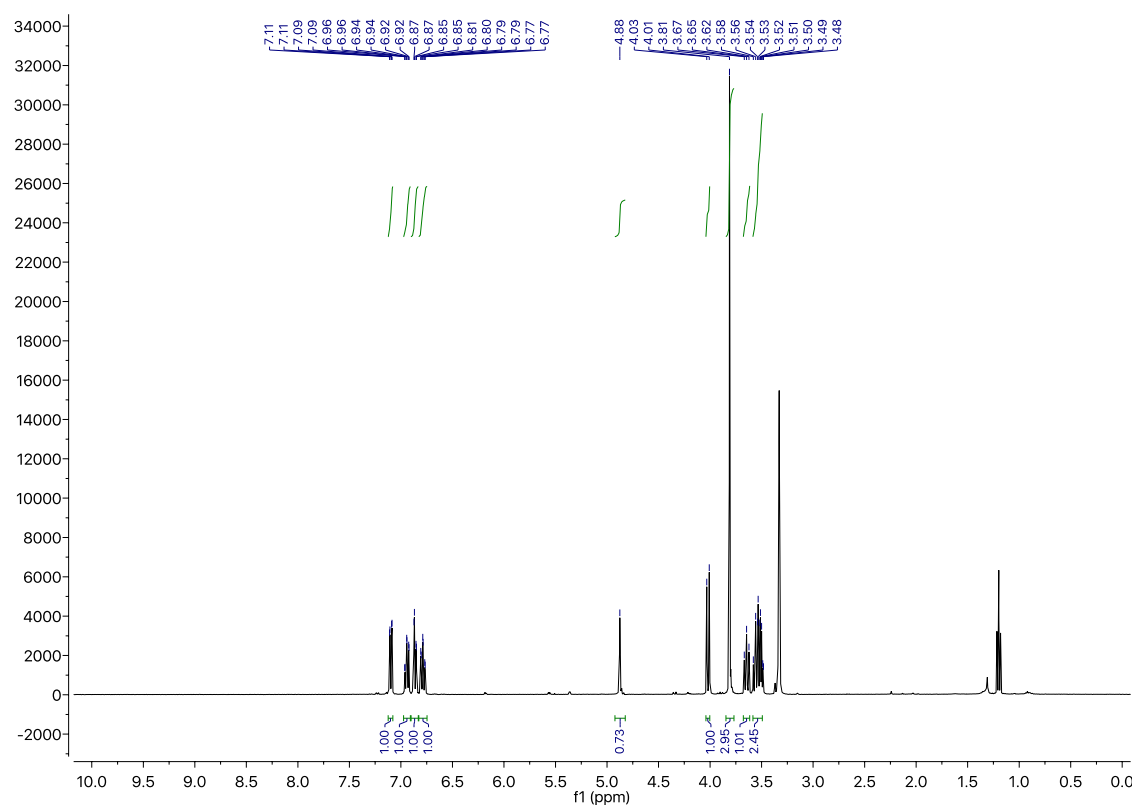

**Figure 27**  $^1\text{H}$  NMR of methyl 1-*O*-(2-hydroxyphenyl)- $\beta$ -D-glucuronate (**7a**).

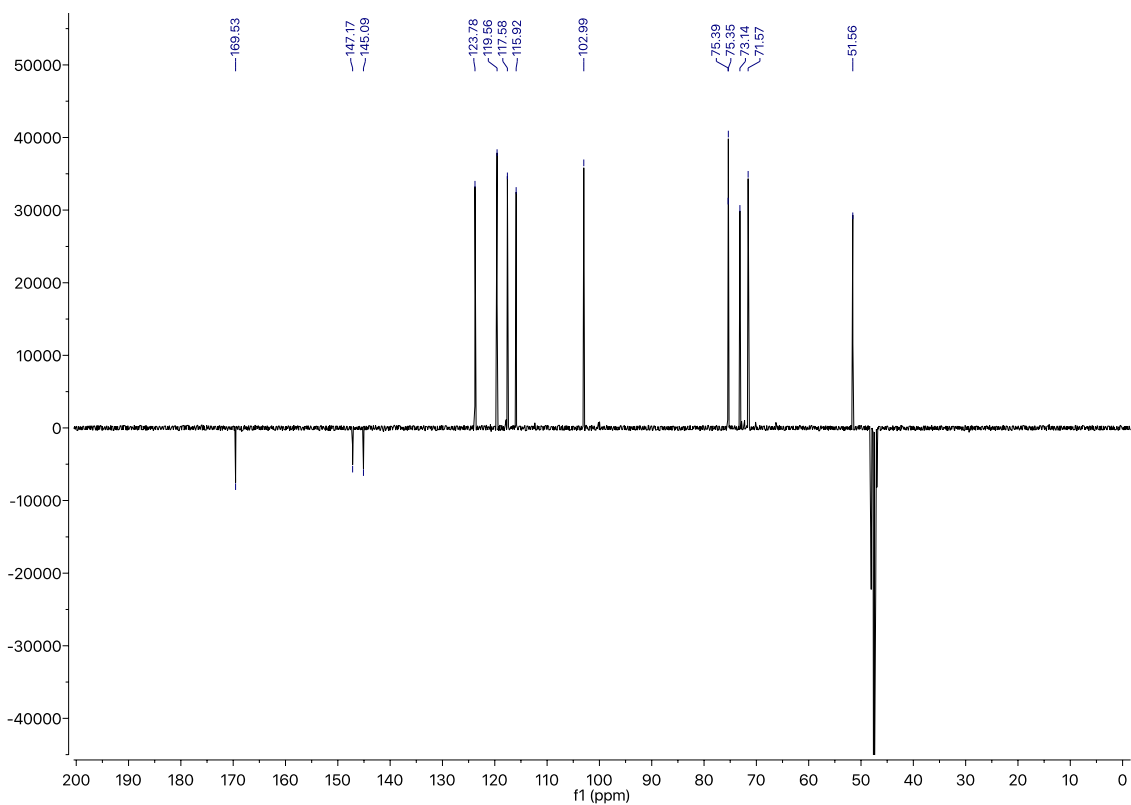

**Figure 28**  $^{13}\text{C}$  NMR of methyl 1-*O*-(2-hydroxyphenyl)- $\beta$ -D-glucuronate (**7a**).

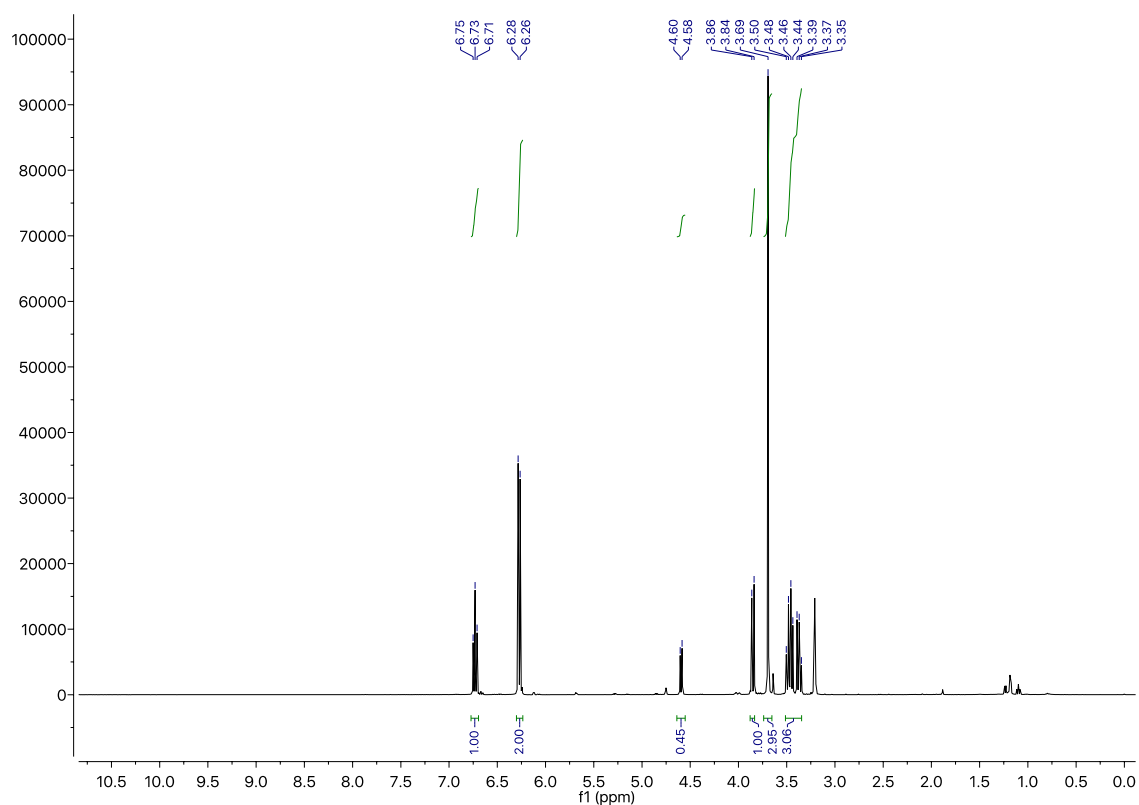

**Figure 29**  $^1\text{H}$  NMR of methyl 1-*O*-(1,3-dihydroxyphenyl)- $\beta$ -D-glucuronate (**7b**).

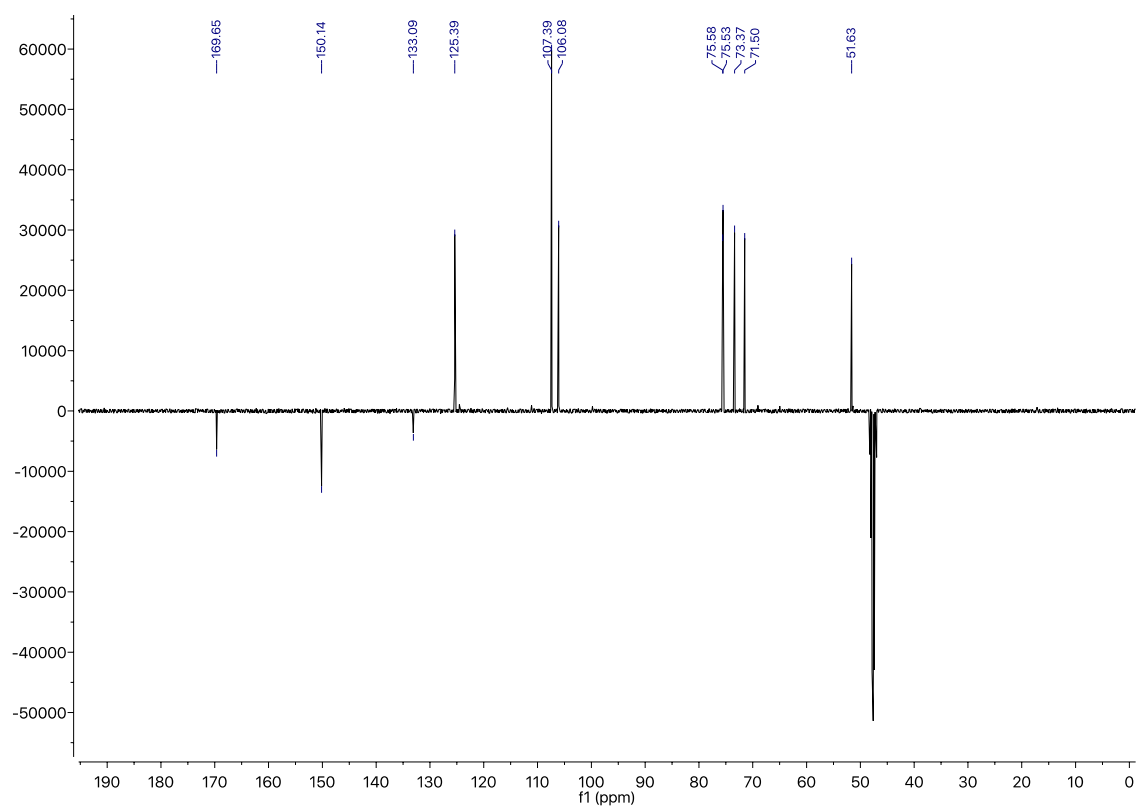

**Figure 30**  $^{13}\text{C}$  NMR of methyl 1-*O*-(1,3-dihydroxyphenyl)- $\beta$ -D-glucuronate (**7b**).

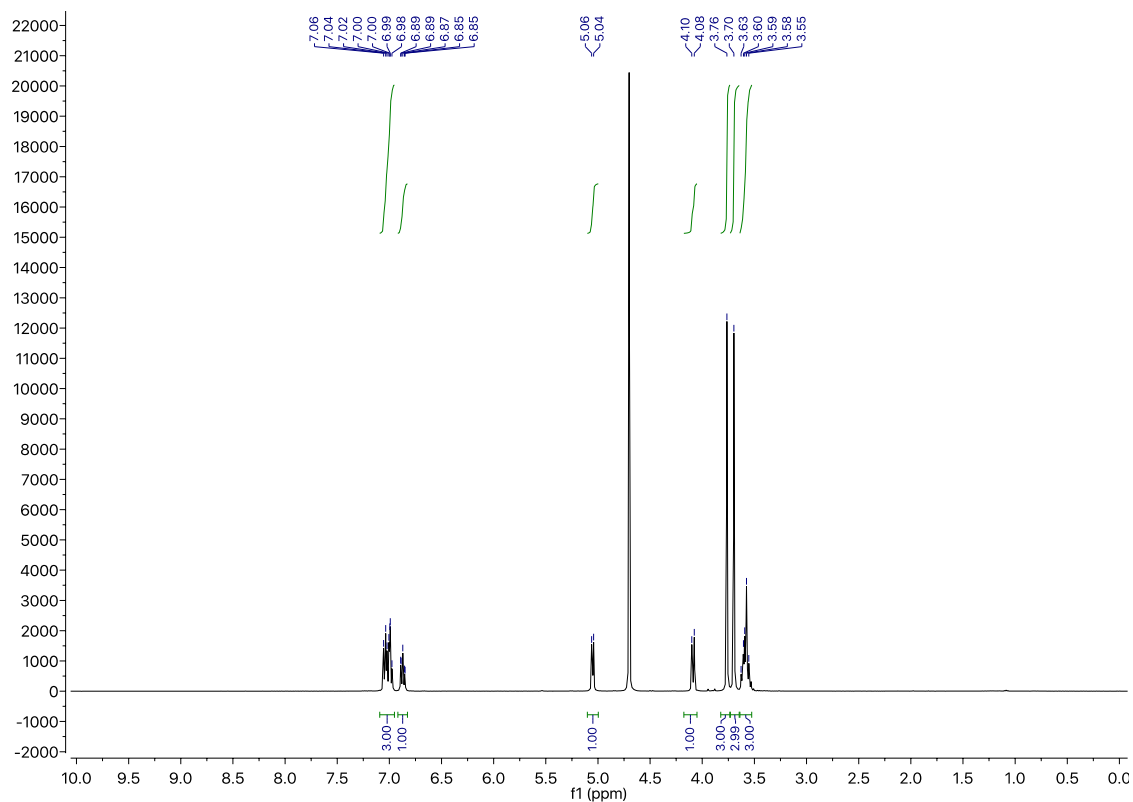

**Figure 31**  $^1\text{H}$  NMR of methyl 1-*O*-(2-methoxyphenyl)- $\beta$ -D-glucuronate (**7c**).

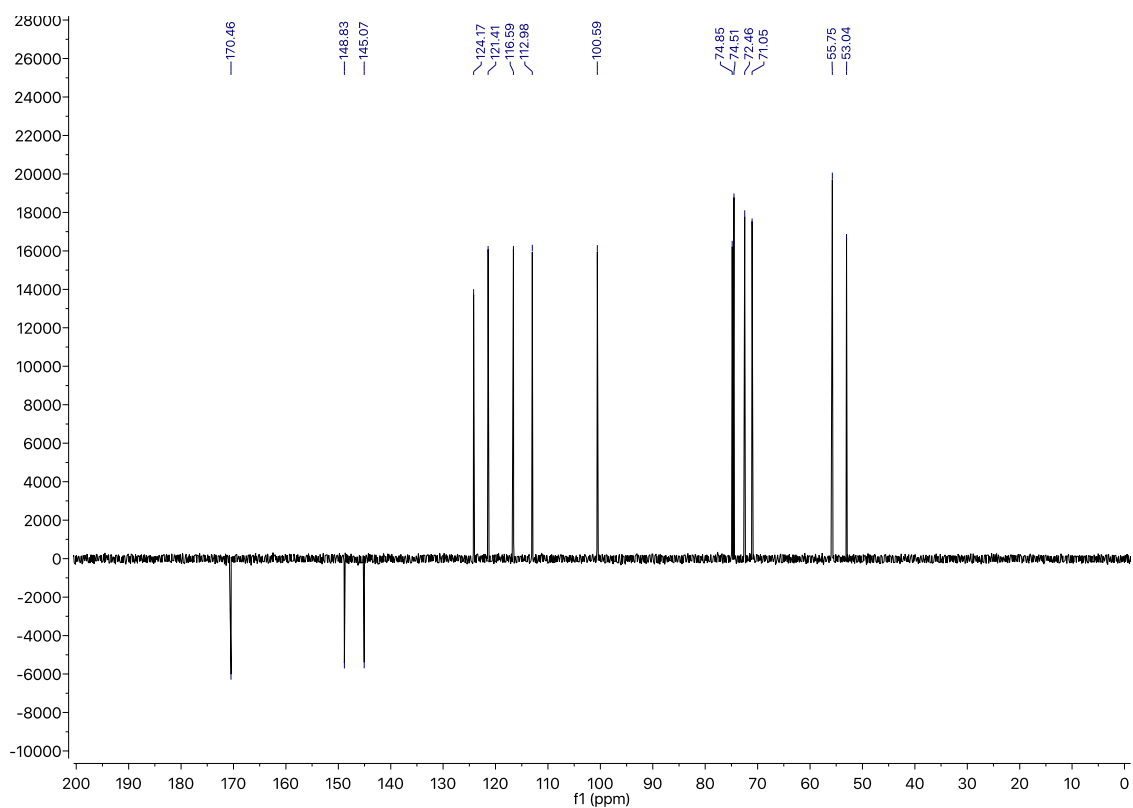

**Figure 32**  $^{13}\text{C}$  NMR of methyl 1-*O*-(2-methoxyphenyl)- $\beta$ -D-glucuronate (**7c**).



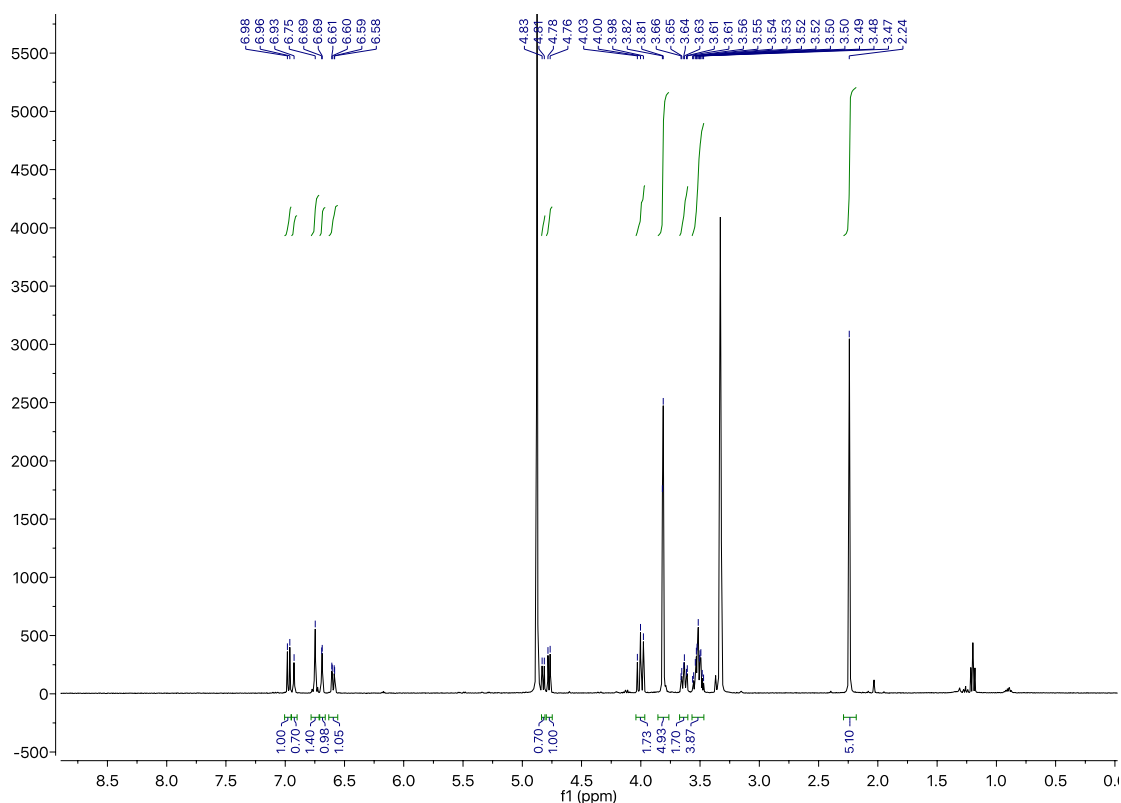

**Figure 33**  $^1\text{H}$  NMR of methyl 1-O-(1-hydroxy-4-methylphenyl)- $\beta$ -D-glucuronate (**7d**) and methyl 1-O-(2-hydroxy-4-methylphenyl)- $\beta$ -D-glucuronate (**7e**).

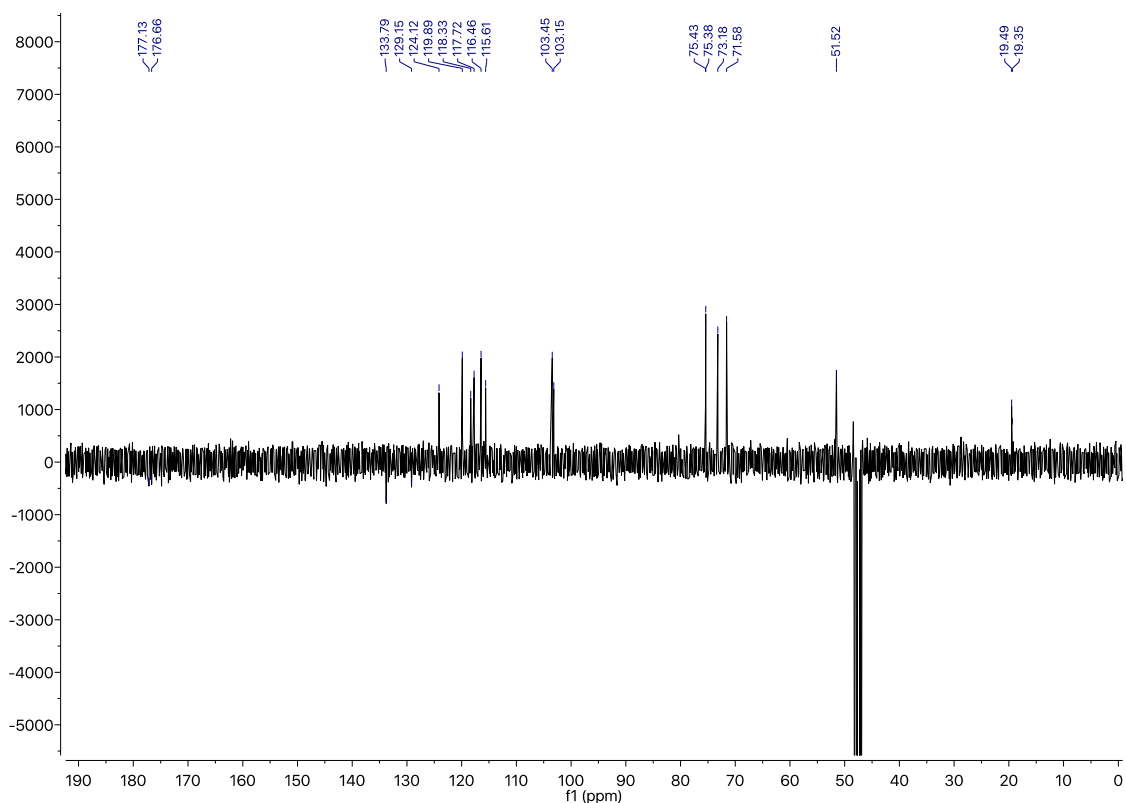

**Figure 34**  $^{13}\text{C}$  NMR of methyl 1-O-(1-hydroxy-4-methylphenyl)- $\beta$ -D-glucuronate (**7d**) and methyl 1-O-(2-hydroxy-4-methylphenyl)- $\beta$ -D-glucuronate (**7e**).

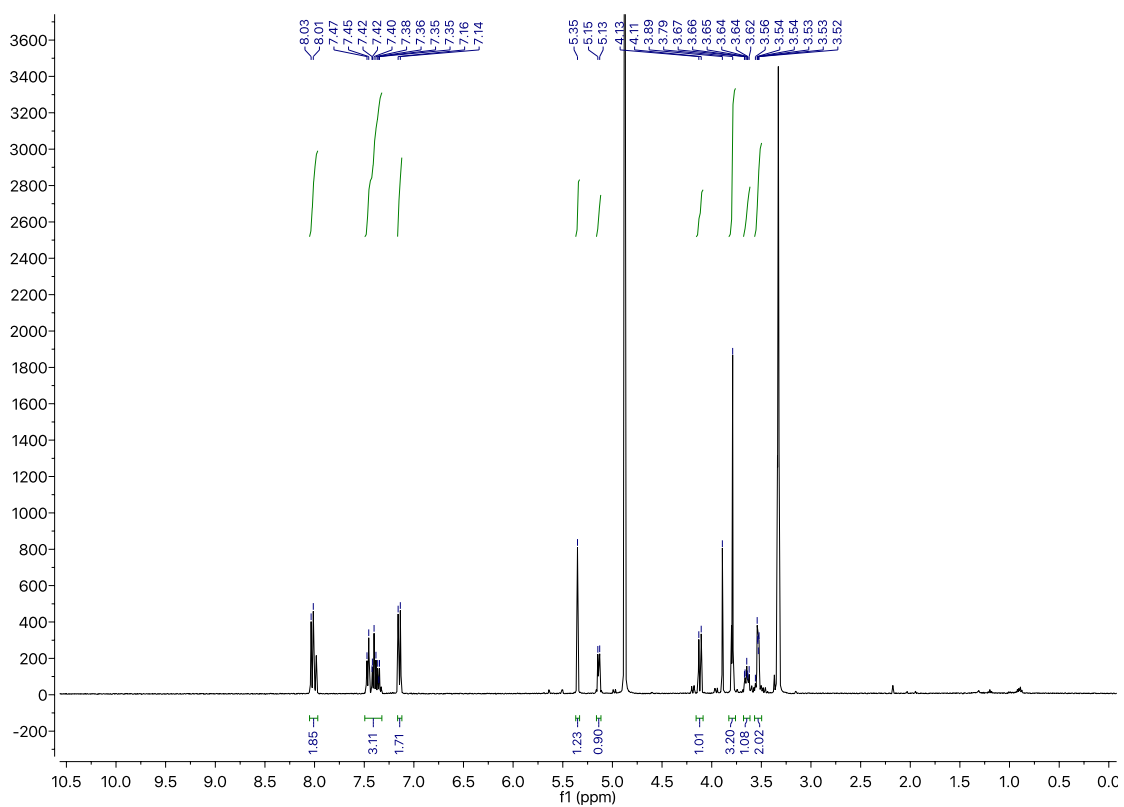

**Figure 35**  $^1\text{H}$  NMR of methyl 1-*O*-(4-benzoxycarbonylphenyl)- $\beta$ -D-glucuronate (**7f**).

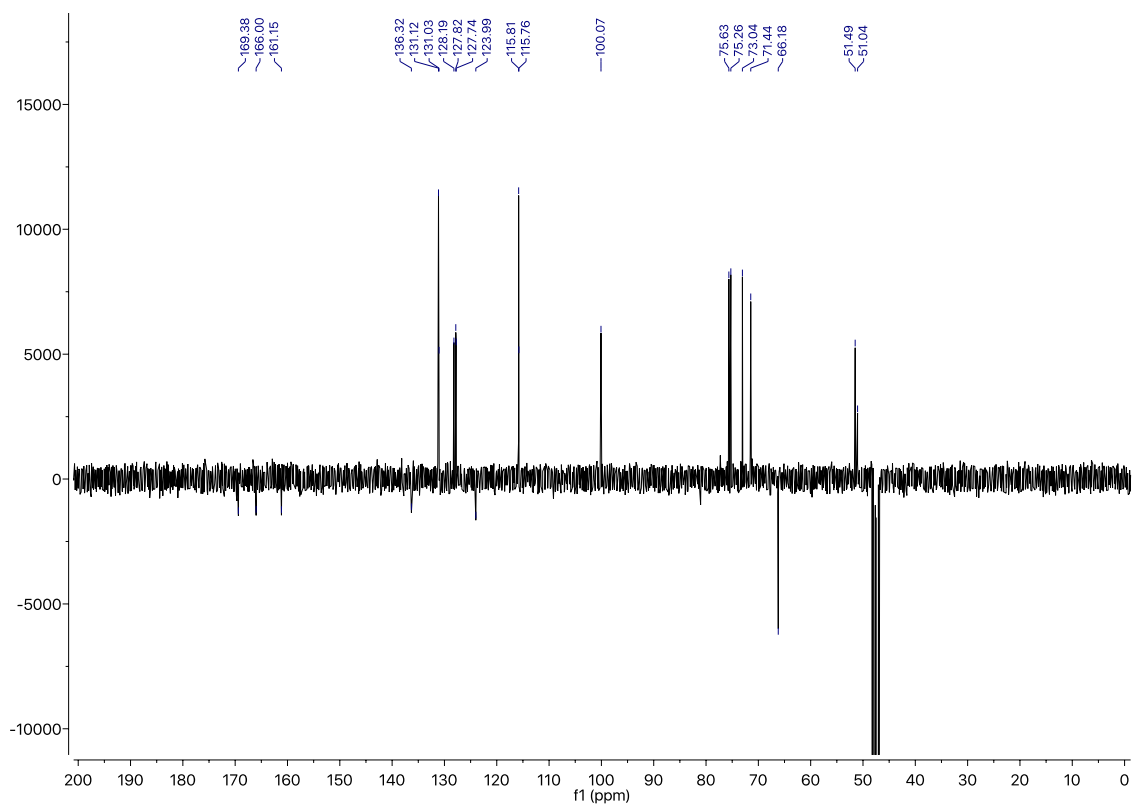

**Figure 36**  $^{13}\text{C}$  NMR of methyl 1-*O*-(4-benzoxycarbonylphenyl)- $\beta$ -D-glucuronate (**7f**).

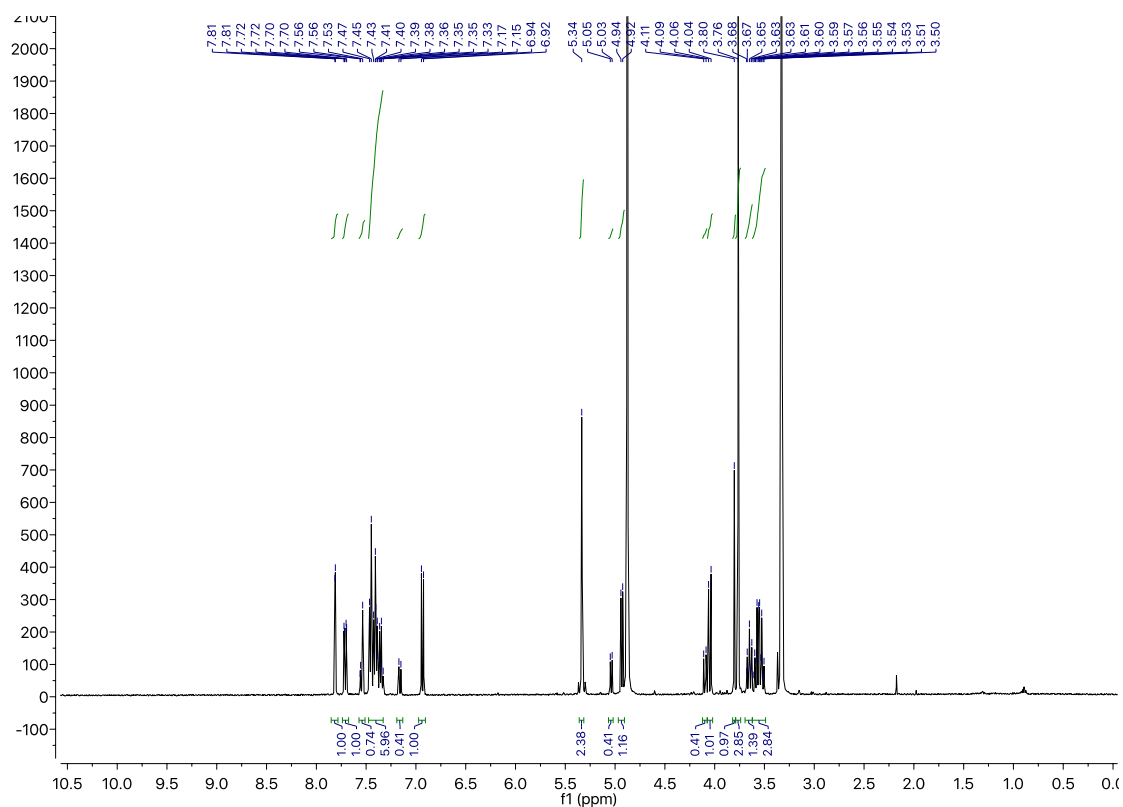

**Figure 37**  $^1\text{H}$  NMR of methyl 1-*O*-(2-hydroxy-4-benzoxycarbonylphenyl)- $\beta$ -D-glucuronate (**7g**) and methyl 1-*O*-(2-hydroxy-5-benzoxycarbonylphenyl)- $\beta$ -D-glucuronate (**7h**).

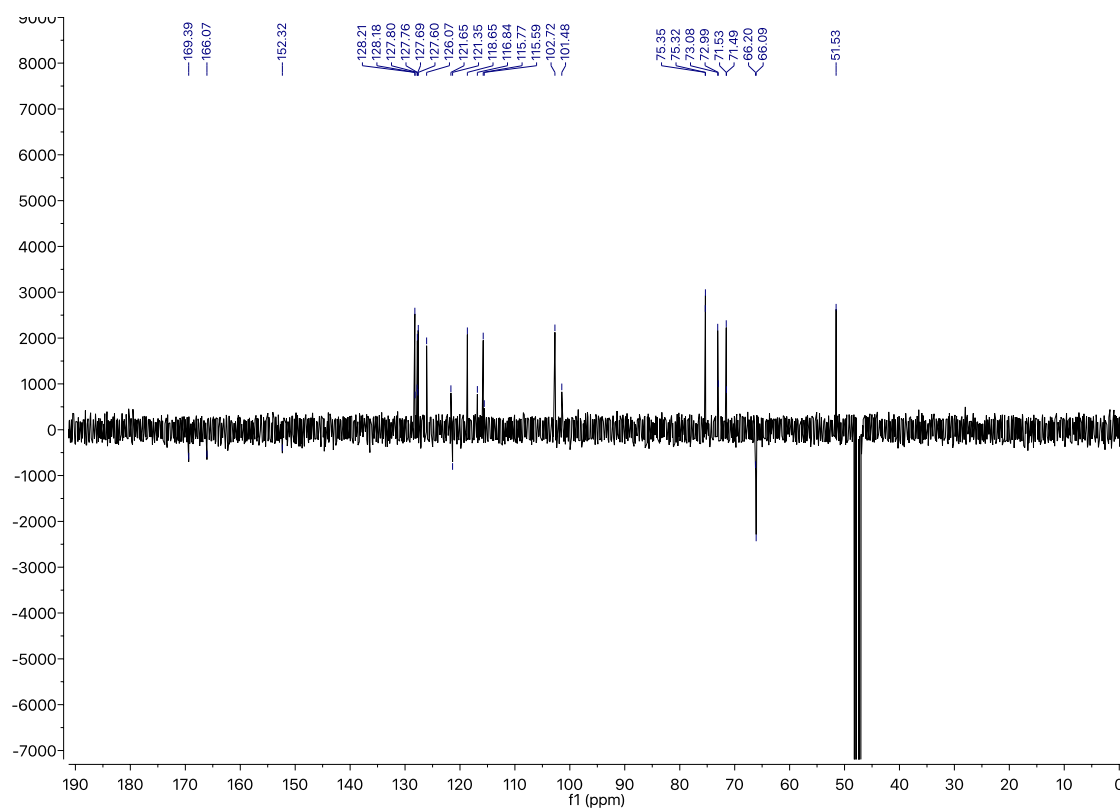

**Figure 38**  $^{13}\text{C}$  NMR of methyl 1-*O*-(2-hydroxy-4-benzoxycarbonylphenyl)- $\beta$ -D-glucuronate (**7g**) and methyl 1-*O*-(2-hydroxy-5-benzoxycarbonylphenyl)- $\beta$ -D-glucuronate (**7h**).

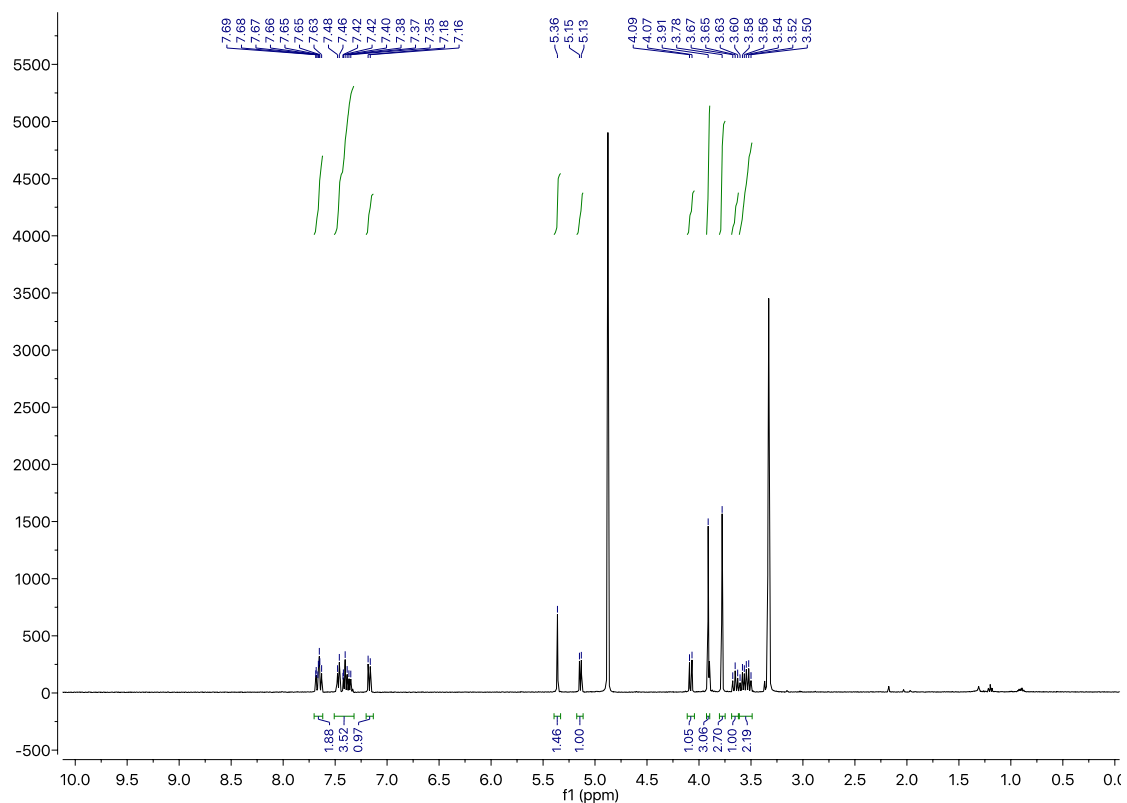

**Figure 39**  $^1\text{H}$  NMR of methyl 1-*O*-(2-methoxy-4-benzoxycarbonylphenyl)- $\beta$ -D-glucuronate (**7i**).

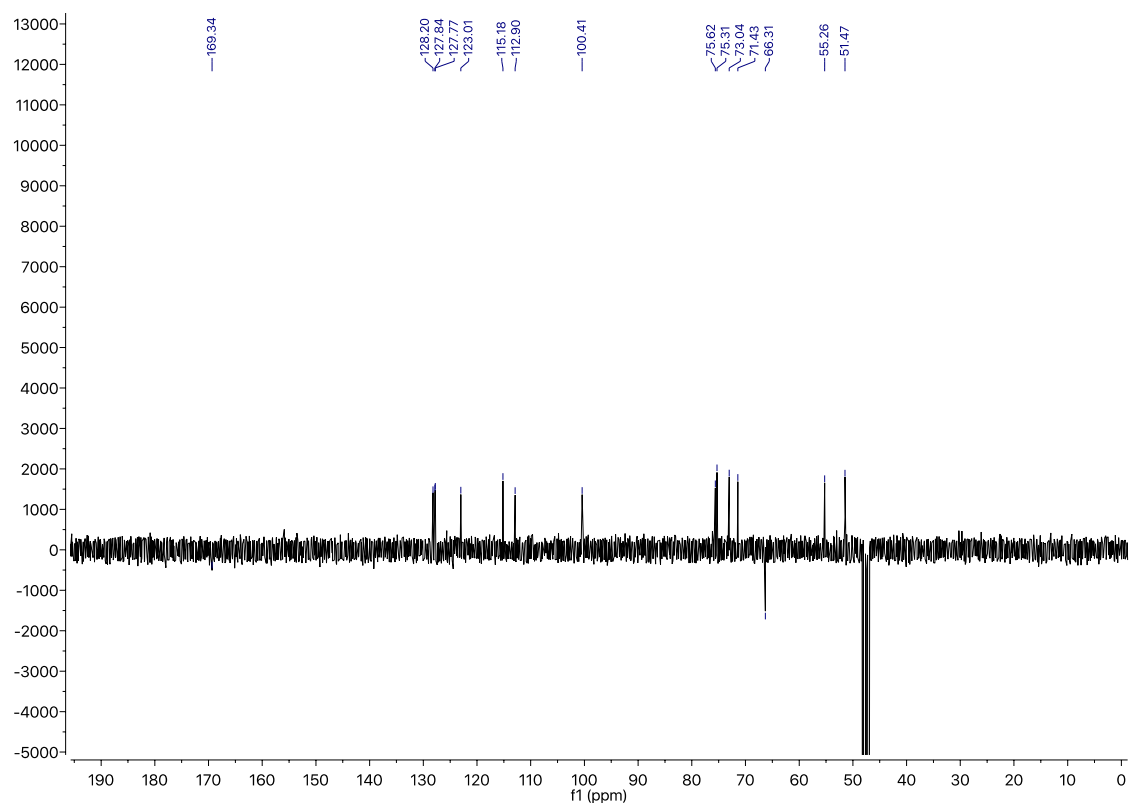

**Figure 40**  $^{13}\text{C}$  NMR of methyl 1-*O*-(2-methoxy-4-benzoxycarbonylphenyl)- $\beta$ -D-glucuronate (**7i**).

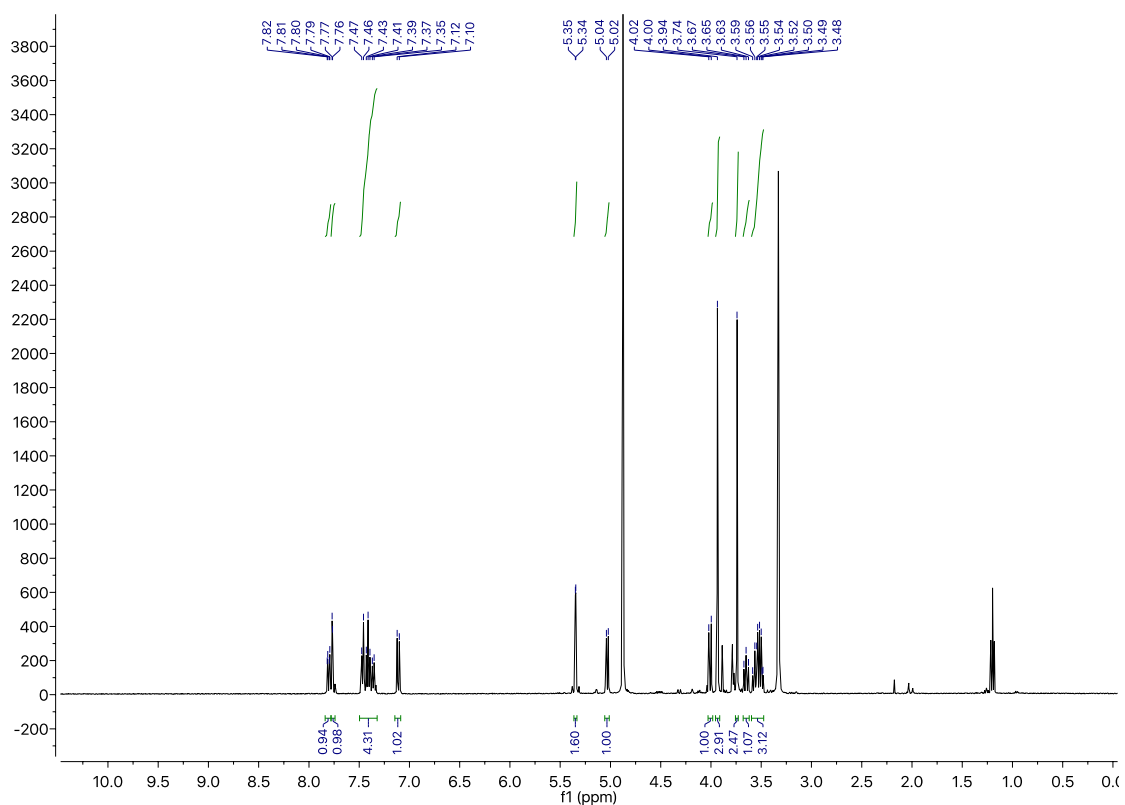

**Figure 41**  $^1\text{H}$  NMR of methyl 1-*O*-(2-methoxy-5-benzoxycarbonylphenyl)- $\beta$ -D-glucuronate (**7j**).

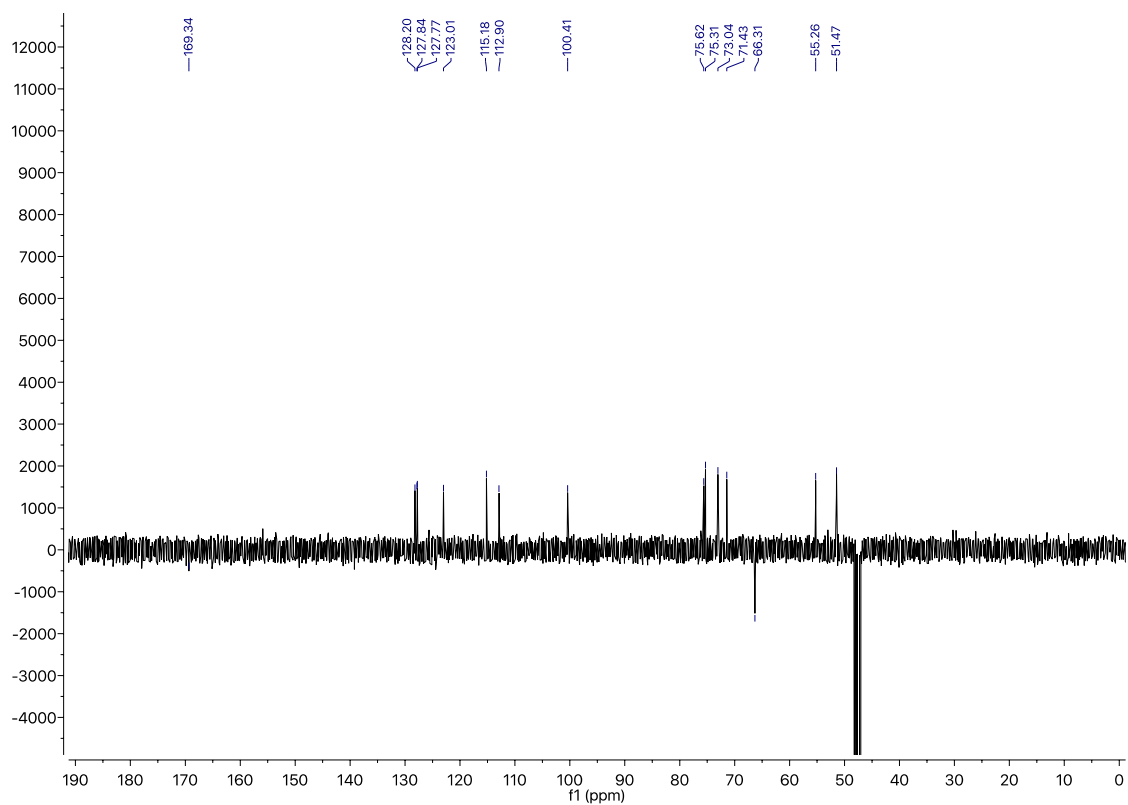

**Figure 42**  $^{13}\text{C}$  NMR of methyl 1-*O*-(2-methoxy-5-benzoxycarbonylphenyl)- $\beta$ -D-glucuronate (**7j**).

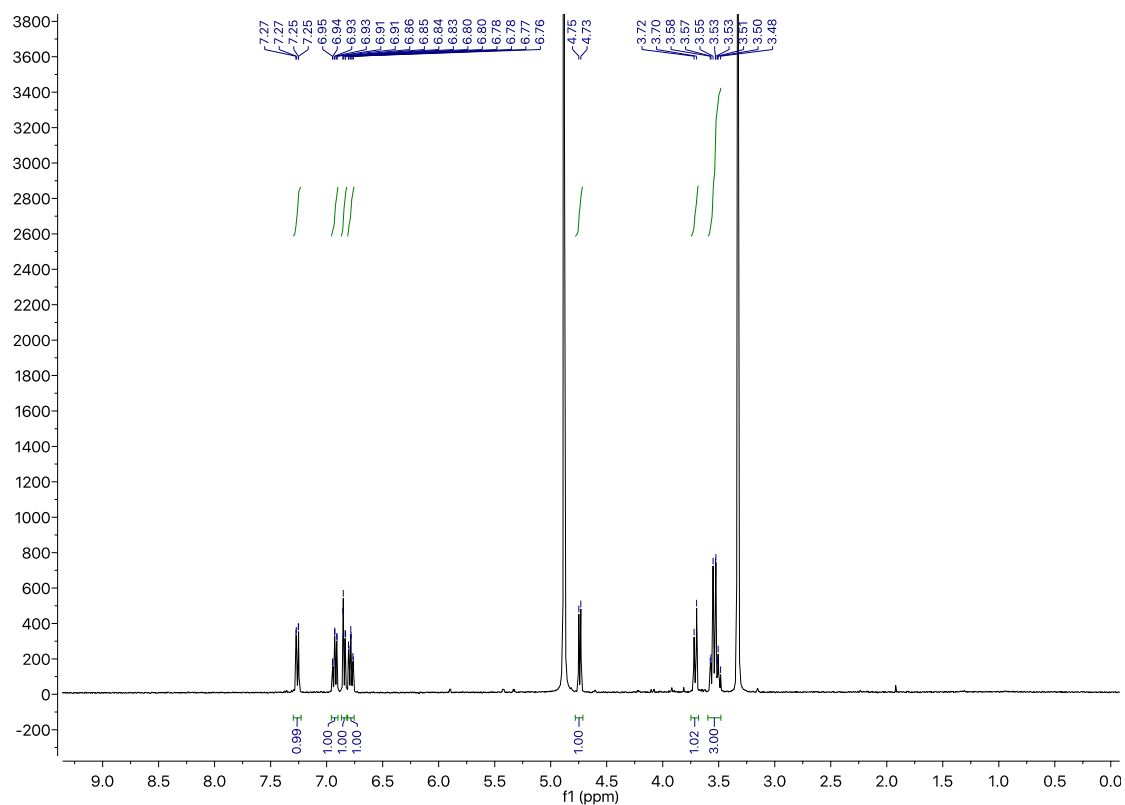

**Figure 43** <sup>1</sup>H NMR of 1-O-(2-hydroxyphenyl)-β-D-glucuronic acid (2a).

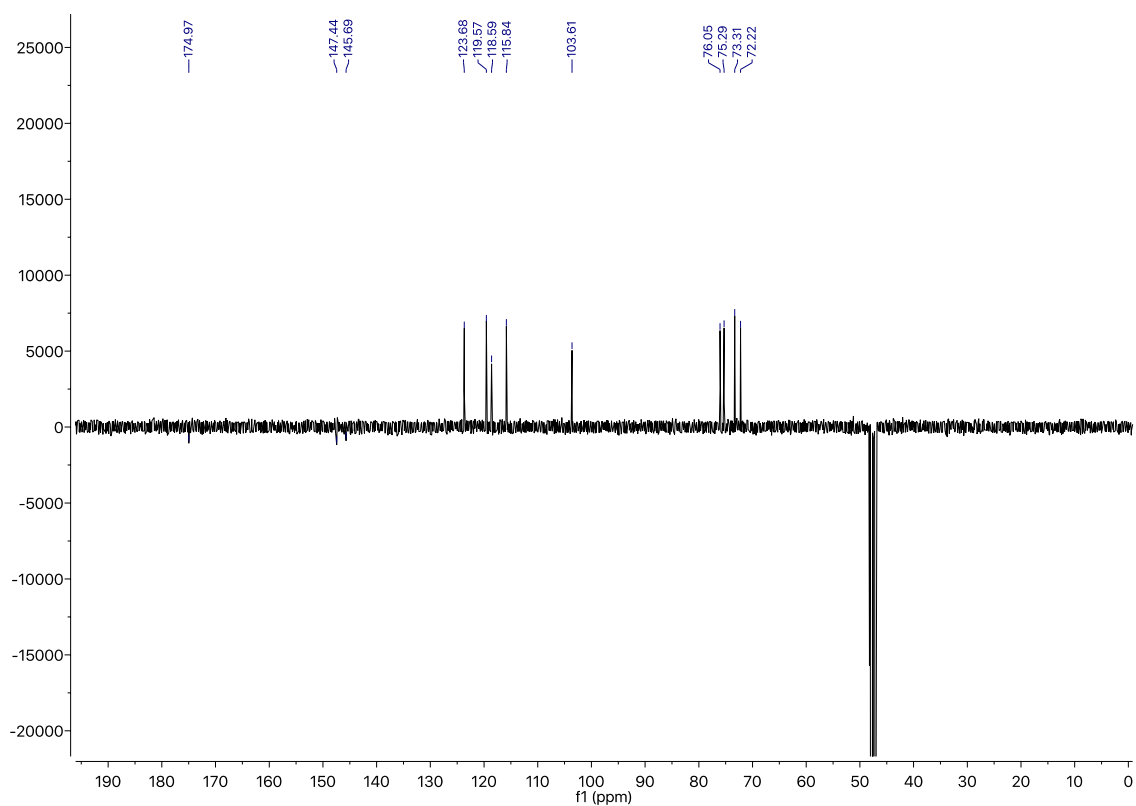

**Figure 44** <sup>13</sup>C NMR of 1-O-(2-hydroxyphenyl)-β-D-glucuronic acid (2a).

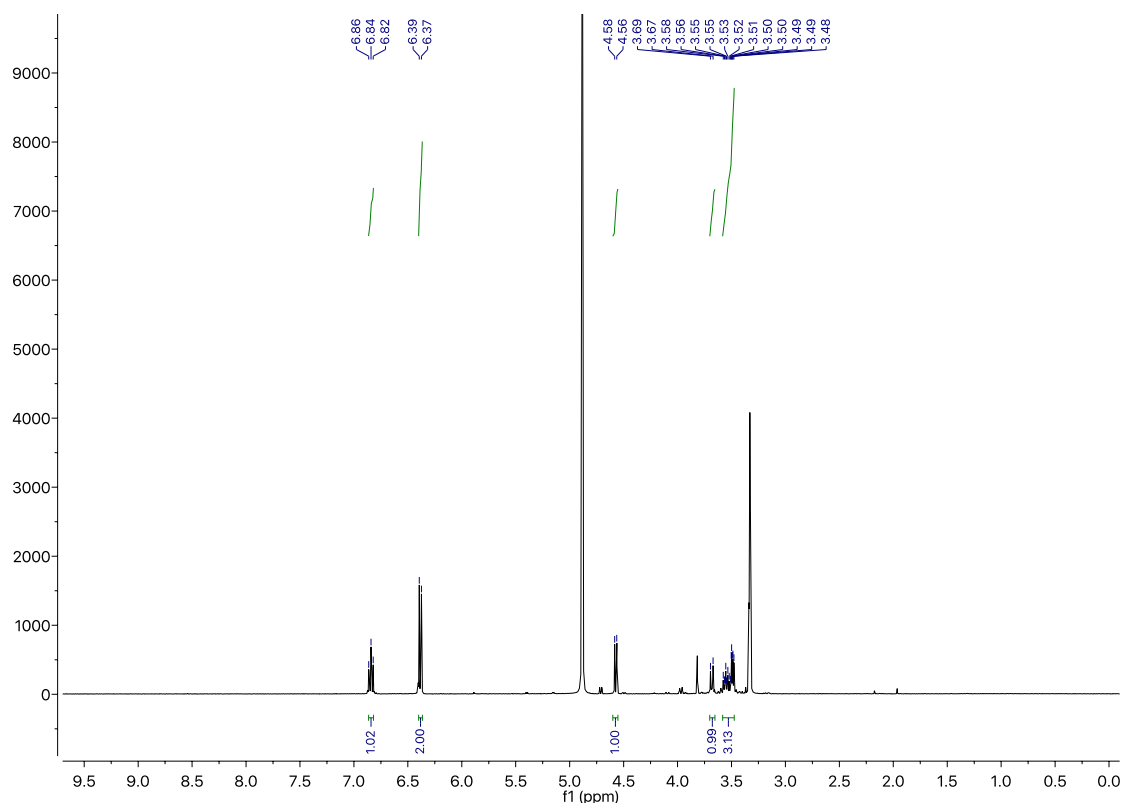

**Figure 45**  $^1\text{H}$  NMR of 1-*O*-(1,3-dihydroxyphenyl)- $\beta$ -D-glucuronic acid (**2b**).

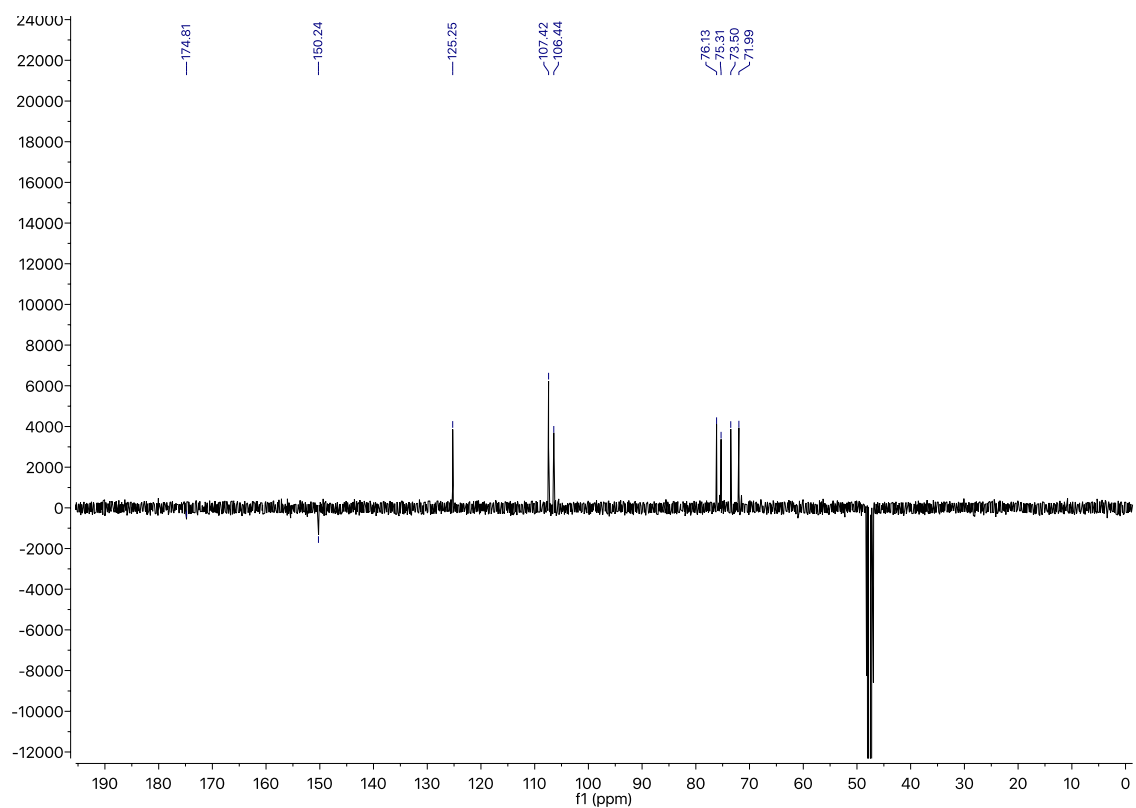

**Figure 46**  $^{13}\text{C}$  NMR of 1-*O*-(1,3-dihydroxyphenyl)- $\beta$ -D-glucuronic acid (**2b**).

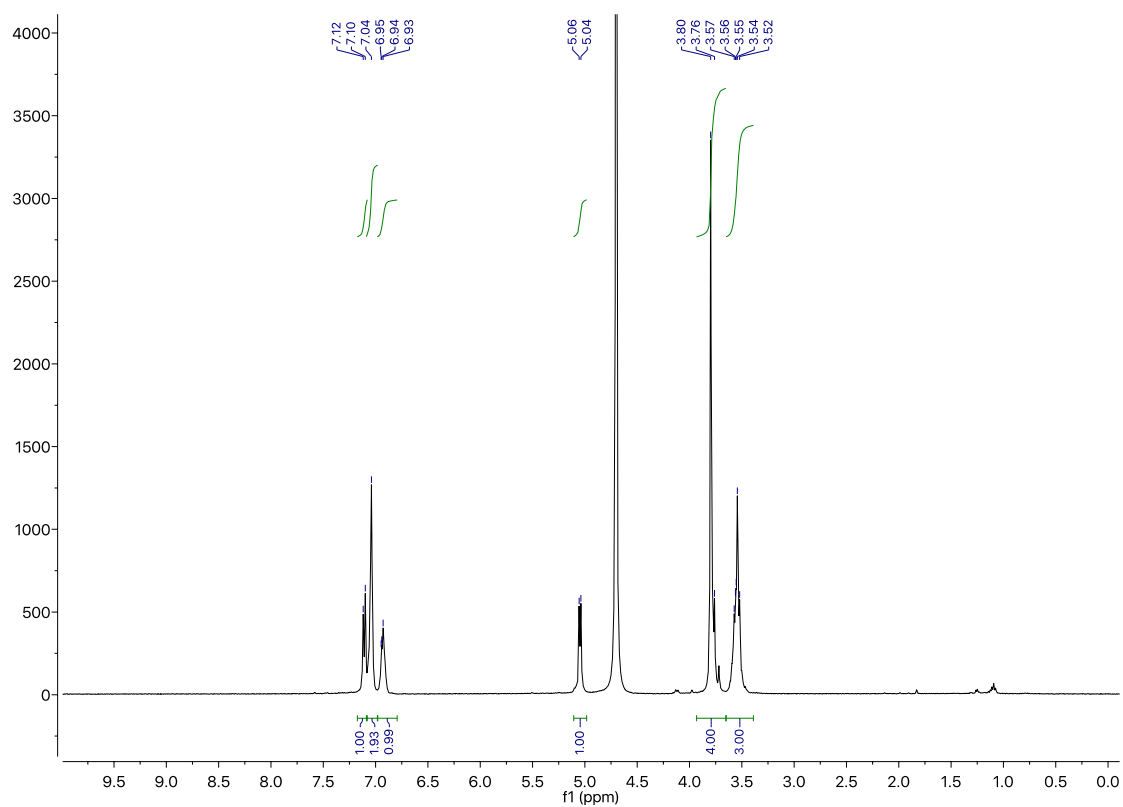

**Figure 47**  $^1\text{H}$  NMR of 1-*O*-(2-methoxyphenyl)- $\beta$ -D-glucuronic acid (**2c**).

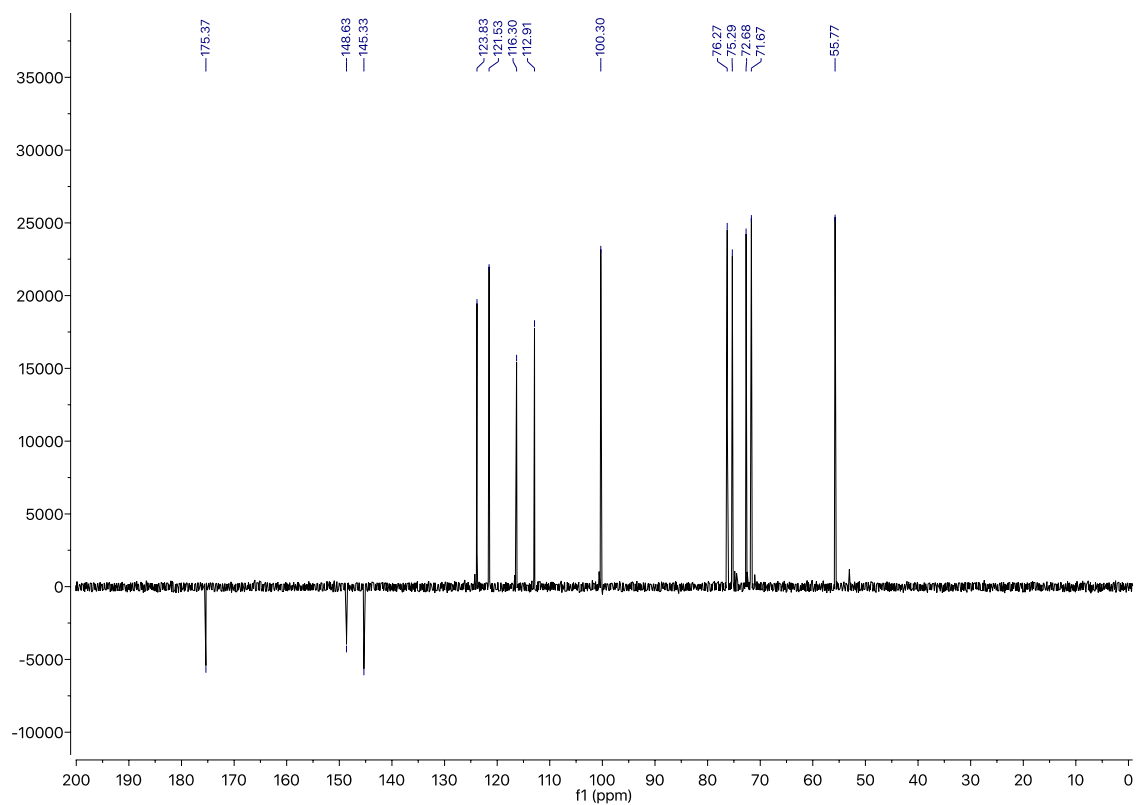

**Figure 48**  $^{13}\text{C}$  NMR of 1-*O*-(2-methoxyphenyl)- $\beta$ -D-glucuronic acid (**2c**).



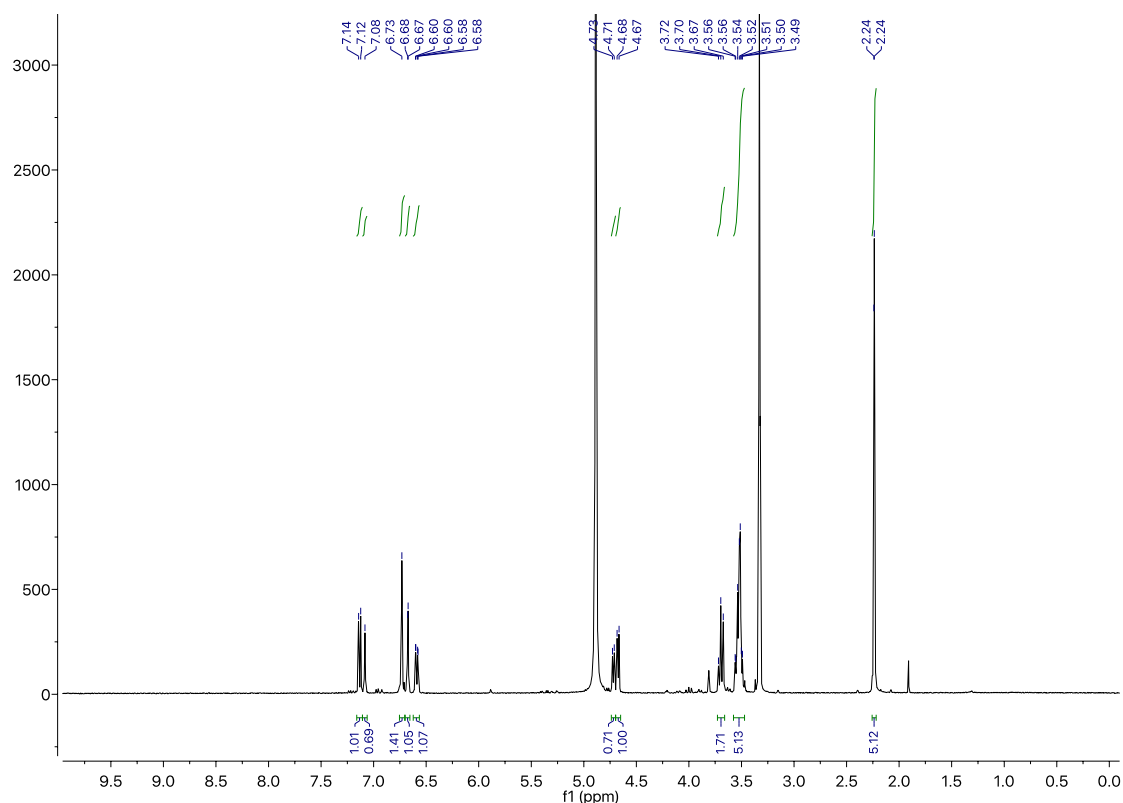

**Figure 49**  $^1\text{H}$  NMR of 1-*O*-(1-hydroxy-4-methylphenyl)- $\beta$ -D-glucuronic acid (**2d**) and 1-*O*-(2-hydroxy-4-methylphenyl)- $\beta$ -D-glucuronic acid (**2e**).

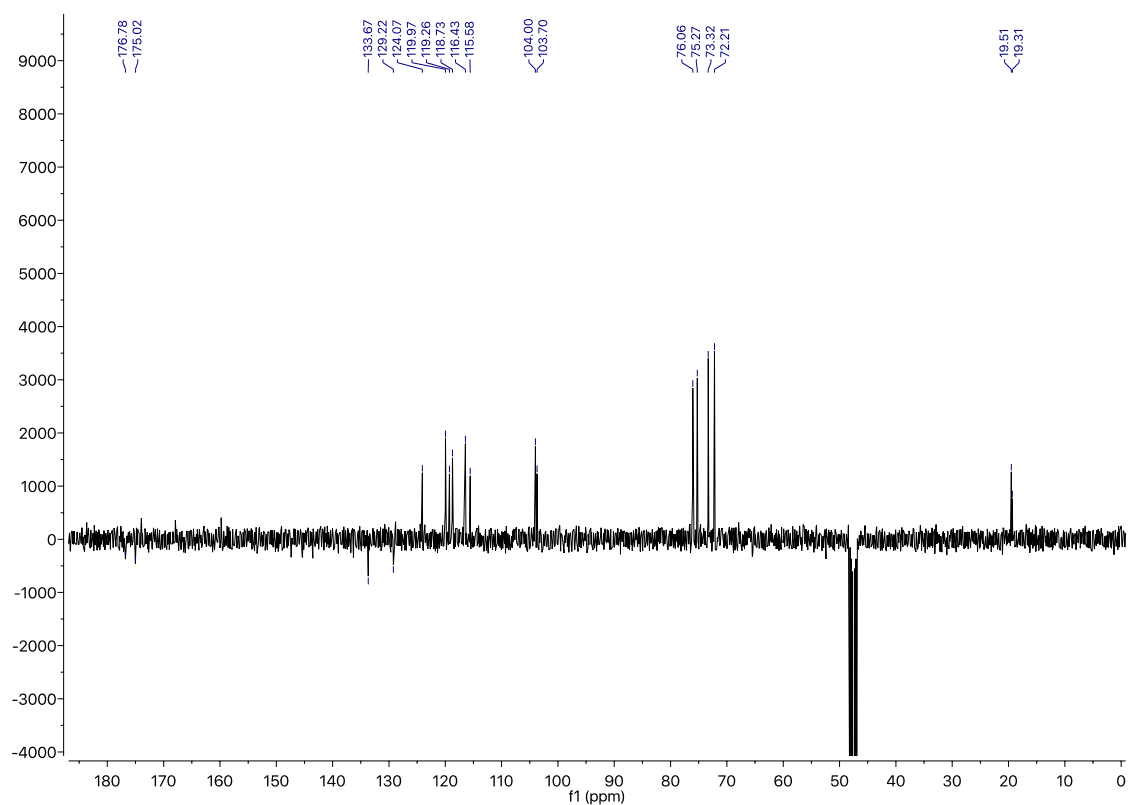

**Figure 50**  $^{13}\text{C}$  NMR of 1-*O*-(1-hydroxy-4-methylphenyl)- $\beta$ -D-glucuronic acid (**2d**) and 1-*O*-(2-hydroxy-4-methylphenyl)- $\beta$ -D-glucuronic acid (**2e**).
